# Goal-dependent tuning of muscle spindle receptors during movement preparation

by

Stylios Papaioannou & Michael Dimitriou\*

**Affiliation:** Physiology Section  
Department of Integrative Medical Biology  
University of Umeå  
S-901 87 Umeå  
Sweden

**Corresponding author:** Dr. Michael Dimitriou  
Email: [mdimitriou@umu.se](mailto:mdimitriou@umu.se)  
Phone: +46-90-786-5186

**Figures:** 9 Main & 6 Supplementary

**Word counts:** Abstract: 150  
Introduction: 494  
Results: 3281  
Discussion: 2085  
Methods: 3924

**Abbreviated title:** Movement preparation tunes muscle spindles

## Abstract

1 Voluntary movements are believed to be advantageously prepared before they are executed, but  
2 the neural mechanisms at work have been unclear. For example, there are no overt changes in  
3 skeletal muscle activity during movement preparation. Here, using a delayed-reach manual task,  
4 we demonstrate a decrease in the firing rate of human muscle afferents (primary spindles) when  
5 preparing stretch rather than shortening of the spindle-bearing muscle. This goal-dependent  
6 modulation of proprioceptors begun early after target onset but was markedly stronger at the  
7 latter parts of the preparatory period. In two additional experiments, whole-arm perturbations  
8 during reach preparation revealed a congruent modulation of stretch reflex gains of shoulder and  
9 upper arm muscles. Our study shows that movement preparation can involve sensory elements  
10 of the peripheral nervous system. We suggest that central preparatory activity can also reflect  
11 sensory control, and preparatory tuning of muscle spindle mechanoreceptors is a component of  
12 planned reaching movements.

## Introduction

13  
14 A key mission in sensorimotor neuroscience is to understand the function and consequence of  
15 “preparatory activity”, that is, the vigorous changes in neural activity that occur in multiple areas  
16 of the brain before onset of a voluntary reaching movement. Although the firing of such  
17 ‘preparatory’ neurons located in e.g., the premotor cortex has been linked to a variety of factors  
18 such as movement direction/extent<sup>1,2</sup> and visual target location<sup>3</sup>, the specific function of  
19 preparatory activity has remained unclear. A previous claim that preparatory activity represents a  
20 subthreshold version of movement-related cortical activity<sup>4</sup> has been contradicted more recently  
21 in support of the notion that preparation sets another initial dynamical state that promotes  
22 execution of the planned movement<sup>5,6</sup>. But it is unclear what this initial state actually entails and  
23 by which neural mechanisms exactly the benefits of movement preparation are realized. For  
24 example, although preparation benefits performance by lowering reaction time<sup>7-9</sup>, with longer  
25 preparation delays generally leading to better movement quality<sup>10</sup>, there are no overt changes in  
26 skeletal muscle activity during movement preparation. Moreover, recent behavioral findings  
27 indicate that movement preparation is mechanistically independent from movement initiation,  
28 with a distinct neural basis<sup>11</sup>.

29 Little attention has been placed thus far on the possibility that preparatory activity may also  
30 reflect control of sensory (i.e., proprioceptive) elements located in the peripheral nervous system.  
31 The aim of the current study was to investigate the impact of goal-directed movement  
32 preparation on muscle spindle output and assess any implications for ‘reflex’ motor responses.  
33 Independent modulation of spindle sensitivity/gain to dynamic muscle stretch (via the  $\gamma$  motor or  
34 ‘fusimotor’ system) could function as movement-related preparation that does not determine  
35 concurrent skeletal muscle activity, but can nevertheless affect the execution of movement  
36 through influencing stretch reflex responses of all latencies i.e., both Short Latency Reflex (SLR)  
37 responses engaging spinal circuits and Long-Latency Reflex (LLR) responses involving  
38 supraspinal centers. In other words, we hypothesize that preparatory activity in the brain may  
39 also underlie goal-appropriate patterns of antagonist engagement, by selectively modulating  
40 spindle output and negative feedback (i.e., mechanical resistance) of stretching muscles during  
41 planned reaching movements.

42 In what follows we describe positive findings generated by three independent but complementary  
43 experiments, each employing a different group of human participants. One experiment focused  
44 on recording muscle afferent activity from hand and digit actuators using microneurography  
45 (experiment ‘1’), and the other two experiments utilized a robotic manipulandum platform to study  
46 ‘reflex’ motor responses at the level of the whole arm (experiments ‘2’ & ‘3’). To our knowledge,  
47 experiment ‘1’ represents the first instance where muscle afferent activity was recorded in a  
48 context involving both a dedicated movement preparation period and active reaching. Recording  
49 from single muscle afferents rather than single fusimotor efferents is feasible but also preferable  
50 in our paradigm involving fully-alert active humans. That is, the result of any substantial change  
51 in  $\gamma$  activity is a change in the output of the muscle spindle, and the spindle organ acts as an  
52 integrator of input from multiple fusimotor fibers<sup>12</sup>.

## 53 Results

54 In experiment ‘1’, participants performed a classic center-out reaching task with the right hand  
55 while we simultaneously recorded hand kinematics, relevant electromyography (EMG) signals  
56 and single afferent activity from wrist or digit extensor muscles (Fig. 1a). Hand movements  
57 controlled the 2D position of a cursor on a monitor, and the participant's task was to move the

58 cursor to reach one of eight peripheral visual targets. The targets/trials were presented in a  
59 block-randomized manner, hence there was no systematic difference in kinematic history across  
60 a particular group of targets. On each trial, a target would suddenly turn into a red filled circle,  
61 representing the target 'cue', and participants were instructed to move to this target as soon as  
62 the 'Go' cue appeared (target turned into a green outline). The participants could 'fail' a trial if  
63 they were too late in reaching the target (see Methods for more details). Recording from single  
64 afferents during naturalistic active movement is very challenging due to the high incidence of  
65 electrode dislocations, and noise in the afferent signal also increases with muscle tension.  
66 Therefore, the delayed-reach task was designed to be short and compact, concentrating on one  
67 albeit fundamental experimental manipulation: visual target location. Figure 1b-c presents  
68 exemplary single-trial data pertaining to the same primary spindle afferent (type 'Ia' afferent).  
69 Despite no overt changes in kinematic variables or EMG during movement preparation, there  
70 was a decrease in the afferent's firing rate when preparing to reach a target that required stretch  
71 of the spindle-bearing muscle (Fig. 1b). However, no such decrease occurred when preparing to  
72 move in the opposite direction that required shortening the muscle (Fig. 1c).

73 From each participant in experiment '1', we recorded muscle afferent activity from one of three  
74 muscles: the radial wrist extensor ('*extensor carpi radialis*'), the ulna wrist extensor (*extensor*  
75 *carpi ulnaris*) or the common digit extensor (*extensor digitorum communis*). Single trials were  
76 categorized according to whether reaching the cued target required a substantial stretch or  
77 shortening of the spindle-bearing muscle (Fig. 2a). Despite no overt movement during the  
78 'preparatory period' i.e., the period between onset of the target cue and onset of the 'Go' cue  
79 (Fig. 2b; top panel), type Ia population responses decreased when preparing to reach targets  
80 associated with stretch of the spindle-bearing muscle, relative to baseline (the latter is defined as  
81 values in the 0.5 sec epoch prior to target onset). The suppression effect appeared ~80 ms after  
82 onset of the target cue and generally seemed to intensify closer to the onset of the 'Go' cue (Fig.  
83 2b). This firing pattern could be seen at the level of single afferent spike-trains (Fig. 1b) and in all  
84 8 recorded type Ia afferents (Fig. 2c), including those from digit extensor muscles that also  
85 stretch by wrist flexion. Single-sample t-tests confirmed the range of confidence intervals plotted  
86 in Figure 2c. Type Ia firing rates in all three epochs pertaining to subsequent muscle stretch  
87 (purple) were significantly different from baseline (epoch '1':  $t(7)=-3.3$ ,  $p=0.013$ ; epoch '2':  $t(7)=-$   
88  $3.1$ ,  $p=0.017$ ; epoch '3':  $t(7)=-5.4$ ,  $p=0.001$ ), but this was not the case for targets associated with

89 subsequent muscle shortening ('blue'; all  $p > 0.33$ ). Indeed, a repeated measures ANOVA of the  
90 design 2 (target direction) x 3 (epoch) showed a main effect of target direction on Ia firing rates  
91 ('stretch' < 'shortening' targets) with  $F(1, 7) = 10.8$ ,  $p = 0.013$  and  $\eta_p^2 = 0.6$ , but the main effect and  
92 interaction involving the 'epoch' condition were not significant ( $p > 0.1$ ). However, complementary  
93 planned comparison tests confirmed the differences across confidence intervals displayed in  
94 Figure 2c. That is, when preparing to reach targets associated with muscle stretch, firing rates  
95 were lower in epoch '3' vs. epoch '1' with  $F(1, 7) = 10.5$  and  $p = 0.014$ , but there was no significant  
96 difference in firing rate between epoch '2' and '3' ( $p = 0.08$ ). The results demonstrate that type Ia  
97 responses started to decrease early-on when preparing a movement that would stretch the  
98 spindle-bearing muscle, and this proprioceptive suppression intensified markedly closer to the  
99 onset of the 'Go' cue.

100 As expected, kinematic and surface EMG signals showed no systematic variation in the  
101 preparatory period as a function of target cue. In certain cases, such as in the de-efferented  
102 spindles of the anaesthetized cat<sup>13</sup>, very small deviations in muscle length have been shown to  
103 impact spindle responses to stretch. Whether or not equivalently small deviations in hand  
104 kinematics could affect spindle responses in our paradigm, we had no reason to expect any  
105 systematic differences in kinematic variability during movement preparation with regard to the  
106 two groups of visual targets (Fig. 2a). Indeed, as reflected in Supplementary Figure 2, t-tests  
107 indicated no significant deviations from baseline during preparation for spindle-bearing muscle  
108 length (all  $p > 0.36$ ), velocity (all  $p > 0.28$ ), acceleration (all  $p > 0.19$ ) or EMG (all  $p > 0.14$ ), and no  
109 variable showed a trend or tendency towards the suppression pattern seen in spindle Ia  
110 responses prior to muscle stretch (i.e., purple epoch '3' < purple epoch '1' in Figure 2c).

111 We also recorded from four secondary spindle afferents (type 'II') and three Golgi tendon organ  
112 afferents (type 'Ib' encoding muscle-tendon tension) during the delayed-reach task. The same t-  
113 test analyses as above indicated no difference from baseline in type II firing rates (all  $p > 0.36$ ;  
114 Supplementary Fig. 3a), with no tendency towards the suppression pattern seen in spindle Ia  
115 responses. As all recorded type Ia afferents exhibited the goal-dependent suppression (Fig. 2c),  
116 and no consistent modulation was observed in type 'II' afferents, this suggests that a goal-  
117 dependent decrease in dynamic  $\gamma$  motor activity occurred when preparing to stretch the spindle-  
118 bearing muscle. These 'dynamic' fusimotor neurons only affect primary spindle receptors and, if

119 everything else is equal (e.g., no movement), a substantive decrease in dynamic fusimotor  
120 output is known to induce some decrease in background (tonic) firing of type Ia afferents<sup>14</sup> as  
121 shown in Fig. 2b-c. However, dynamic fusimotor supply has a much stronger effect on the gain of  
122 spindle output to dynamic muscle stretch<sup>12,14</sup>. A lowered spindle gain for stretching antagonists  
123 represents a degree of 'on-line' sensory attenuation of own action, and this proprioceptive  
124 suppression could also diminish counteractive negative feedback responses at all latencies.  
125 Interestingly, there also seemed to be a universal increase in type Ib firing rates regardless of  
126 target group (Supplementary Fig. 3b), and this did not parallel the state of the relevant parent  
127 EMG (Supplementary Fig. 3c). Although single-sample t-tests showed no difference from  
128 baseline in type Ib responses (all  $p > 0.09$ ), a 2 (target group) x 3 (epoch) repeated-measures  
129 ANOVA yielded a main effect of target group ( $F(1, 2) = 21$ ,  $p = 0.044$  and  $\eta_p^2 = 0.9$ ), indicating that  
130 the increases in Ib firing rate were larger for shortening targets. There was no significant effect of  
131 epoch or interaction effect between target group and epoch ( $p > 0.21$ ). Because Golgi tendon  
132 organs and their respective Ib afferents are responsive to force produced by muscle fibers, this  
133 would appear to contradict the widely held belief of no changes in skeletal muscle activity during  
134 movement preparation; this universal increase in Golgi responses needs to be further confirmed  
135 by recording from a larger group of type Ib afferents. However, even if the type Ib effect is shown  
136 to be robust, it does not contradict the hypothesis that goal-dependent decreases in type Ia firing  
137 are due to suppression of  $\gamma$  neurons that are controlled independently of  $\alpha$  motor neurons. Type  
138 Ib firing rates are unlikely to represent spindle state as intrafusal muscle fibers are known to  
139 make negligible contributions to muscle force<sup>15</sup>. Most important, however, the direction of the Ib  
140 effect (increase) is the same for both visual target groups (i.e., see purple and blue epoch '3';  
141 Supplementary Fig. 3b), indicating that a different mechanism was at play here than the one  
142 controlling primary spindles. In other words, if the mechanism or underlying mechanical state  
143 responsible for modulating type Ib responses was also the one shaping type Ia responses, one  
144 would expect a larger suppression of type Ia activity for shortening targets, which was not the  
145 case (e.g., 'blue' in Fig. 2c). In addition, if the above were true, some systematic effect in type II  
146 afferent responses would also occur but none was found (Supplementary Fig. 3a).

147 Subsequent analyses also suggest an attenuation of dynamic  $\gamma$  influence on antagonist muscle  
148 spindles in delayed reach. As mentioned above, dynamic fusimotor activity has a weaker positive  
149 effect on tonic type Ia responses ('offset') and a much stronger positive effect on the spindle's

150 sensitivity to dynamic muscle stretch ('gain'). Factors potentially shaping muscle spindle  
151 responses during active movement include spindle-bearing muscle length, velocity, acceleration  
152 and EMG, the latter used as a proxy for any 'alpha-gamma co-activation'<sup>16-18</sup>. A forward stepwise  
153 regression indicated that only velocity and acceleration exerted a significant impact on type Ia  
154 population responses during reaching (Fig. 3a-b), with standardized beta coefficient=0.44 and  
155  $p < 10^{-5}$  for velocity, and beta=0.21 and  $p = 0.025$  for acceleration ( $R^2 = 0.72$ ,  $p < 10^{-5}$ ). As expected,  
156 there was a significant relationship between velocity and empirical type Ia firing rates (Fig. 3d),  
157 with  $r = 0.84$  and  $p < 10^{-5}$ , but there was no significant one-to-one relationship between acceleration  
158 and firing rates ( $r = 0.24$ ,  $p = 0.32$ ). That is, spindles were unable to unambiguously 'encode'  
159 acceleration (Fig. 3f). Conducting equivalent analyses with type Ia firing rates from the radial  
160 wrist extensor muscle alone produced congruent results (Fig. 3c): only velocity and acceleration  
161 had a significant impact with beta=0.53 with  $p < 10^{-5}$  for velocity, and beta=0.25 with  $p = 0.01$  for  
162 acceleration ( $R^2 = 0.79$ ,  $p < 10^{-5}$ ). Similarly, the muscle's Ia firing rate had a significant relationship  
163 with velocity but not with acceleration (Fig. 3e & 3g). The above findings contrast with those  
164 where hand reaching movements are performed without a preparatory delay. Specifically, in  
165 'unprepared' manual reaching, the relative impact of acceleration on Ia responses from the radial  
166 wrist extensor is about twice as large (i.e.,  $\beta > 0.5$ ) and greater than that of velocity, with a  
167 significant direct relationship existing between acceleration and Ia firing rate<sup>17</sup>.

168 As mentioned above, changes in tonic Ia firing during movement preparation are presumed to be  
169 -at least partly- indicative of dynamic fusimotor activity levels. If the system sought to  
170 systematically attenuate fusimotor outflow to antagonist muscles, this implies that suppression of  
171 spindle output from stretching antagonists is beneficial for reaching performance. We show that a  
172 likely consequence of fusimotor attenuation is the decrease in spindle sensitivity to acceleration.  
173 But some sensitivity to acceleration clearly remained at the population level (Fig. 3b-c), in turn  
174 suggesting possible individual differences in the control of spindle sensors with implications for  
175 task performance. It is known that movement preparation benefits performance by lowering  
176 reaction time<sup>7-9</sup>, with a positive relationship existing between preparation delay length and  
177 movement quality<sup>10</sup>. Interestingly, although we found no relationship between type Ia firing rates  
178 observed during late preparation (i.e., epoch '3') and reaction time (Fig. 4a-b), there was a strong  
179 relationship between wrist type Ia responses at epoch '3' and time to peak velocity during reach,  
180 with  $r = 0.9$  and  $p = 0.035$ . (Fig. 4c). Every unit increase in firing rate during preparation involved an

181 additional 3 ms delay in reaching peak velocity; that is, the regression coefficient was 3. We  
182 found no equivalent relationship between this performance measure and kinematic variables or  
183 EMG (Supplementary Fig. 4). The relationship between time to peak velocity and Ia firing levels  
184 at late preparation seemed to extend beyond muscles that powered movement in the reaching  
185 task. For all but one afferent from digit extensors, the same relationship was found between type  
186 Ia firing rates and time to peak velocity ( $r=0.91$ ,  $p=0.004$ , 'b' coefficient=0.301; Fig. 4d). Note that  
187 digit extensors can also affect execution of hand flexion via spinal and transcortical negative  
188 feedback circuits.

189 Indeed, muscle spindles play a central role in stretch reflex responses. A substantial goal-  
190 dependent suppression of spindle gains could lead to equivalent changes in negative feedback  
191 gains. In order to test this prediction of experiment '1', we used a popular methodological  
192 approach for assessing stretch reflex function at the level of the whole upper limb. Namely, in  
193 experiment '2', participants performed a version of the delayed-reach task by holding the  
194 graspable end of a robotic manipulandum with their right hand. They started each trial by  
195 bringing the hand at a central target ('origin'; see Fig. 5a). The hand could then be slowly loaded  
196 in either the upper-left ( $135^\circ$ ) or lower-right direction ( $315^\circ$ ), or there could be no load. One of two  
197 possible targets would then be cued by turning red, and after either a 'long' or relatively 'short'  
198 preparatory delay (see Methods for more details) the hand would be perturbed in the same or  
199 opposite direction as the target i.e., either in the  $135^\circ$  or  $315^\circ$  direction (Fig. 5b). Importantly,  
200 even when perturbations were in the direction of the cued target, participants had to complete the  
201 planned movement themselves as the size of the perturbation was only about a third of the  
202 distance to the target. This ensured that movement control was required on every trial of this  
203 task, regardless of perturbation direction. Figure 5c-e displays the median responses of a  
204 representative participant. Despite identical displacement during the haptic perturbations, visual  
205 inspection of the EMG signal from the unloaded pectoralis indicates a clear difference at spinal  
206 SLR latencies as a function of cued target (i.e., 25-50 ms following perturbation onset; Fig. 5c).  
207 This difference is congruent with the afferent findings: a relative suppression of the SLR  
208 response when preparing to stretch the pectoralis (purple) rather than shorten it (blue). This  
209 suppression completely disappeared at high background activation levels of the pectoralis,  
210 induced by an external load applied prior to the haptic perturbation (Fig. 5e). A goal-dependent



211 suppression of LLRs (i.e., EMG 75-100 ms post-perturbation) was evident across all load  
212 conditions.

213 Figure 6a-c represents the equivalent to Figure 5c-e for all participants. The same trends can be  
214 seen in continuous EMG signals, that is, a goal-dependent suppression of pectoralis SLR and  
215 LLR. To concentrate on the effect of cued target while accounting for known effects, such as the  
216 universal increase in SLR magnitude that accompanies muscle loading<sup>19-21</sup>, the EMG signals for  
217 each muscle, load condition and delay condition were contrasted (subtracted) as a function of  
218 target cue. This effectively isolated any effect of target cue on SLR responses (but see also LLR  
219 analyses across loads). Note that in experiment '2' and '3' we only analyzed EMG signals from  
220 stretching muscles (i.e., particular pairs of muscle and perturbation direction) in order to  
221 concentrate on stretch reflex responses. When the preparation delay was long (Fig. 6d), single-  
222 sample t-test indicated a significant suppression of pectoralis SLR when preparing stretch in the  
223 'muscle unloaded' condition, i.e., when an external (pre-)load was applied in the direction of  
224 muscle shortening ( $t(13)=-3.5$ ,  $p=0.004$ ). There was also a significant effect of goal in the no-load  
225 condition ( $t(13)=-2.5$ ,  $p=0.025$ ), but there was no relative suppression as a function of target cue  
226 in the 'muscle loaded' condition i.e., when the external load was applied in the direction of  
227 pectoralis stretch ( $t(13)=-0.23$ ,  $p=0.82$ ). Interestingly, when the preparation delay was relatively  
228 'short' (250 ms; Fig. 6e-h), there was no suppression of SLRs when an external load was applied  
229 in either direction ( $p>0.8$ ) but there was a relatively weak suppression effect in the no-load  
230 condition, with  $t(13)=-0.25$ ,  $p=0.025$ . A congruent pattern of effects was observed for the  
231 posterior deltoid muscle (Supplementary Fig. 5). Specifically, when the preparation delay was  
232 long, there was a significant suppression of deltoid SLR in the 'muscle unloaded' condition  
233 ( $t(13)=-3.7$ ,  $p=0.002$ ). There was also significant suppression of SLR in the no-load condition  
234 when the delay was short ( $t(13)=-3.3$ ,  $p=0.006$ ).

235 It is already well-established<sup>22-25</sup> that LLR (or "R3") responses are goal-dependent and influenced  
236 by proprioceptive feedback. Indeed, as can be appreciated by visually inspecting the EMG traces  
237 of the pectoralis (Fig. 6) or posterior deltoid (Suppl. Fig. 5), LLR responses were congruent with  
238 the goal-dependent afferent results: there is a relative suppression of gains when the target cue  
239 is associated with stretch of the particular muscle. But analyses of LLR responses confirmed an  
240 even closer connection to the afferent suppression pattern. Specifically, across all load

241 conditions, there was a stronger goal-dependent suppression of LLR responses following a ‘long’  
242 rather than a ‘short’ preparatory delay, with  $t(13)=-3.63$  and  $p=0.003$ ,  $t(13)=-3.45$  and  $p=0.004$ ,  
243  $t(13)=-3.2$  and  $p=0.007$ , for the pectoralis, anterior and posterior deltoid muscle, respectively  
244 (Fig. 7a). Crucially, the ‘short’ preparatory delay here was 250 ms. This is longer than the  
245 previously identified delays of 100-150 ms, after which there is apparently no significant  
246 improvement in goal-dependent modulation of LLRs, at least as demonstrated by applying  
247 perturbations about the elbow joint<sup>26</sup> alone. In contrast, the current effect of delay length on LLRs  
248 is congruent with the spindle tuning profile (i.e., a goal-dependent modulation that is weak early  
249 on but markedly stronger late in preparation), hence supporting the presence of an independent  
250 and relatively slow-evolving mechanism acting on proprioceptors during reach preparation (as  
251 reflected in Fig. 2b-c). Interestingly, our analyses found no significant effect of delay length on  
252 LLRs of biceps and triceps muscles (all  $p>0.05$ ). Performing the same analyses only across  
253 cases where the muscles were loaded (i.e., load applied in the direction of muscle stretch)  
254 produced equivalent positive findings for shoulder muscles (Fig. 7b), and again no significant  
255 effects for ‘elbow’ muscles. However, increasing the workspace of the center-out task in a third  
256 experiment (i.e., increasing task demands) reproduced the main positive findings of experiment  
257 ‘2’ and also revealed an effect of delay length on LLR responses of elbow muscles.

258 Specifically, a third experiment implicating a larger number of visual targets produced equivalent  
259 results for pectoralis SLR (i.e., experiment ‘3’; Fig. 8). When the preparation delay was relatively  
260 long and the pre-load was in the direction of pectoralis shortening (Fig. 8a-c), there was a goal-  
261 dependent suppression of SLR gains, with  $t(11)=-4.1$ ,  $p=0.002$  (Fig. 8d). Although for most  
262 participants SLRs were suppressed in the no-load condition as well (middle column in Fig. 8d),  
263 the overall difference was deemed not significant ( $p=0.2$ ; note the one deviant value  $>0$ ). As in  
264 experiment ‘2,’ there was a small but significant suppression of SLRs in the no-load condition  
265 when the delay was short (Fig. 8e-h), with  $t(11)=-2.8$ ,  $p=0.017$ . As in experiment ‘2,’ LLRs of  
266 shoulder muscles closely reflected the spindle suppression pattern. That is, across all load  
267 conditions, goal-appropriate suppression of shoulder muscle LLR was stronger if a ‘long’ rather  
268 ‘short’ delay preceded congruent perturbations, with  $t(11)=-2.42$  and  $p=0.034$ ,  $t(11)=-2.22$  and  
269  $p=0.048$ ,  $t(11)=-2.3$  and  $p=0.042$ , for the pectoralis, anterior and posterior deltoid muscle,  
270 respectively. A significant effect of delay length was also found for the triceps lateralis, with  
271  $t(11)=-3.74$  and  $p=0.003$ . To better contrast the seemingly conflicting results of experiment ‘2’

272 and '3' regarding the effect of preparatory delay length on 'elbow' muscles, the data were  
273 contrasted separately for each of the three main axes of motion involved in experiment '3':  
274 diagonal (as in experiment '2'), vertical and horizontal (Fig. 9). As in experiment '2', there was no  
275 effect of delay length on biceps and triceps LLR responses when action was required along the  
276 diagonal axis ( $p > 0.05$ ). However, along the horizontal dimension, there was a stronger goal-  
277 dependent suppression of biceps LLR following a long delay ( $t(11) = -2.73$  and  $p = 0.02$ ), and the  
278 same effect was evident for the triceps when target cues required action along the vertical axis  
279 ( $t(11) = -4.02$  and  $p = 0.002$ ). The above results suggest that the increased task demands (i.e.,  
280 larger workspace) of experiment '3' necessitated the proprioceptive control of a larger group of  
281 muscles, even though the perturbations themselves were always applied along the diagonal  
282 axis, as in experiment '2'. Taken together, the results of experiment '2' and '3' confirm that the  
283 spindle tuning profile observed during preparation (i.e., a goal-dependent modulation that was  
284 weak early on but markedly stronger late in preparation) impacted stretch reflex gains,  
285 particularly those of LLRs that are largely unaffected by "automatic" gain-scaling<sup>19-21</sup> and  
286 generally can contribute much more to generated forces than SLRs.

## 287 Discussion

288 Our results indicate that movement preparation can involve goal-appropriate tuning of muscle  
289 spindle receptors. This assigns a novel and specific role to central preparatory activity in  
290 proprioceptive tuning with implications for stretch 'reflex' behavior. Our findings are congruent  
291 with classic results concerning preparatory activity in the CNS and its two hallmarks which are (a)  
292 that preparatory activity should not overtly affect concurrent skeletal muscle activity and, (b)  
293 preparatory activity needs to somehow promote or facilitate the planned movement. The current  
294 study helps bridge the gap between traditional views where preparatory activity is seen as  
295 representing specific movement parameters<sup>1-4</sup>, and the more recent claims that movement  
296 preparation shapes an initial state of a dynamical system whose evolution produces the planned  
297 movement<sup>5,6</sup>. We show that such an 'initial' state may partly pertain to the state of the peripheral  
298 proprioceptive apparatus, which can predispose the system for sensory attenuation and stretch  
299 reflex suppression of muscles that will lengthen during the desired voluntary movement. One can  
300 speculate that failure to properly engage this mechanism may contribute to target undershoot  
301 ('dysmetria') and perhaps spasticity. But even in the healthy population, this preparatory

302 mechanism may represent a significant source of individual differences in motor performance.  
303 Indeed, we found that higher levels of tonic type Ia discharge at late preparation are associated  
304 with worse reaching performance (i.e., larger delays in attaining peak velocity; Fig. 4b). This  
305 relationship can be understood in terms of the spindle's role in generating negative feedback via  
306 stretch reflexes.

307 The current study is the first to record muscle afferent responses during movement preparation  
308 (i.e., over a dedicated delay period) in a context where voluntary reaching movements were  
309 actually made. One other study<sup>27</sup> implicating the upper limb looked at spindle responses when  
310 anticipating the need to make a contraction that would oppose an expected external perturbation.  
311 No preparatory effects were found but we believe our paradigm better reflects the state of affairs  
312 when reaching in every-day life, as the task combined true reaching intention and action. There  
313 has also been strong evidence of preparatory activity in spinal interneurons<sup>28,29</sup>, but our study is  
314 the first to document preparatory changes in sensory elements of the peripheral nervous system.  
315 Hence, we show that preparatory activity can be associated with implementation of control policy.  
316 The central origin of fusimotor control was not directly addressed by the current study, but some  
317 clues are offered. Preparatory activity in the cortex can appear in as little as 50 ms following  
318 onset of the target cue<sup>6,30</sup> and activity of corticospinal neurons can be suppressed during  
319 movement preparation<sup>31</sup>. Although the spindle suppression effect seems to begin early, at ~80  
320 msec after the target cue, the suppression is initially weak and becomes much stronger at the  
321 later stages of preparation (Fig. 2b-c). The evolution of this effect is congruent with the tendency  
322 of preparatory CNS signals to differentiate more clearly according to preferred direction closer to  
323 the onset of the 'Go' cue e.g.,<sup>5,6</sup>. The general profile of proprioceptive suppression suggests an  
324 early and a later phase to this process (Fig. 2b-c). This may in turn reflect two different sources  
325 of fusimotor control, an early subcortical one (e.g., brainstem<sup>32-34</sup>) and a later cortical one.  
326 However, identifying the precise CNS origin or specific descending pathways associated with  
327 preparatory fusimotor control is unnecessary for the purposes and main novel claim of this study  
328 i.e., that there is advantageous preparatory tuning of muscle spindle receptors.

329 The general expectation of no specific role for spindle receptors during movement preparation  
330 has been formulated indirectly, primarily through behavioral studies examining spinal SLR  
331 responses in surface EMG from the upper limb. Although there has been some evidence of goal-

332 dependent modulation of SLRs, both at the level of digits<sup>35</sup> and at more proximal areas<sup>36</sup>,  
333 previous studies at the level of the digits and more recent studies using robotic platforms to  
334 assess reflex responses of more proximal muscles have not identified goal-dependent spinal  
335 SLR responses; but such responses are consistently found at transcortical latencies<sup>22</sup>. The  
336 results of experiments '2' and '3' suggest that, given a particular experimental design, goal-  
337 dependent modulation of SLRs can be consistently induced (Figs. 6, 8 & Supplementary Fig. 5).  
338 Two important elements of our experimental design are the systematic manipulation of  
339 background load and ensuring that movement control is required for reaching every target.  
340 Regarding the first, many previous studies either did not account for the background activation  
341 levels of muscles or deliberately pre-loaded muscles to ensure detectable levels of surface EMG  
342 in the SLR epoch. We show that strongly loading a muscle can potentially obscure evidence of  
343 goal-dependent proprioceptive tuning (e.g., Fig. 6a-c). That is, our results show that load-related  
344 or "automatic" gain-scaling<sup>19-21</sup> of SLRs for the purposes of postural control may compete or  
345 otherwise interfere with target-dependent tuning of spinal SLRs. But muscle spindle gains  
346 -modified by independent  $\gamma$  control- are not necessarily affected by background mechanical  
347 loading. Indeed, when imposing stretch of the isometrically loaded radial wrist extensor, no clear  
348 net difference in spindle sensitivity is found, as an approximately equal number of 'dynamic' and  
349 'static' fusimotor effects appear with these two having opposite effects on spindle gain<sup>37</sup>.  
350 Nevertheless, across all load conditions, we show a modulation LLR gains that closely reflects  
351 the spindle's preparatory tuning profile (e.g., Fig. 7). That is, we show a goal-appropriate  
352 modulation of gains that is stronger following longer than relatively shorter preparatory delays.

353 Crucially, the 'short' delays used in our study are longer than the previously identified delays of  
354 100-150 ms, after which no significant improvement in goal-dependent modulation of LLRs has  
355 been previously reported, at least as demonstrated by applying single-joint perturbations about  
356 the elbow<sup>26</sup> (in fact, they noted a deterioration of LLR behavior for delays >200 ms<sup>26</sup>). The LLR  
357 results stemming from the center-out reaching paradigm of the current study are supportive of an  
358 independent and relatively slow-evolving mechanism acting on proprioceptors during reach  
359 preparation. Our findings are also compatible with reported improvements in reach movement  
360 quality that occur for preparation delays >150 ms<sup>10</sup>. Equivalent SLR effects were also detected in  
361 the current study, except when muscles were strongly pre-activated. A likely reason for the  
362 apparent saturation of spinal SLR responses in loaded muscles is the excitation state of spinal

363 circuits. Even if spindle gains remain suppressed (but not fully) when about to stretch a loaded  
364 muscle, a high spinal excitability level can still lead to large SLR responses, obscuring any goal-  
365 dependent tuning of muscle spindles (i.e., ceiling effect; but the opposite extreme is also  
366 problematic, see e.g., Supplementary Fig. 5c). Nevertheless, it is well-known that LLR  
367 responses are robustly goal-dependent and largely immune to load-based or “automatic” gain-  
368 scaling”<sup>19-21</sup>. In this context, appropriate LLR responses can emerge simply by linking goal-  
369 dependent afferent signals to transcortical feedback circuits<sup>22,38,39</sup> that are not subject to  
370 automatic gain scaling.

371 One study that examined stretch reflex responses of unloaded (“pre-inhibited”) elbow muscles  
372 following perturbations of the forearm about the elbow did not report task-dependency of SLR,  
373 instead documenting flat-lined EMGs at spinal latencies<sup>40</sup>. But these null SLR responses across  
374 targets could have been due to high levels of reciprocal inhibition, brought on by placing a large  
375 ‘pre-inhibiting’ load at the single joint. Moreover, “no substantial muscle activity” was observed  
376 overall, including at voluntary latencies. Indeed, their ‘IN-OUT’ paradigm did not require  
377 participants to engage in movement control during congruent perturbations as the hand was  
378 moved inside the target area early-on by the perturbation itself (i.e., large target area was  
379 adjacent to hand origin). A second important element of our experimental design was ensuring  
380 that active/voluntary movement control was required for reaching the target throughout the task.  
381 That is, participants had to actively complete movement to the target on every trial, including  
382 after congruent perturbations (see e.g., purple velocity profiles in Fig 5c-e). Hence, on such trials  
383 the participants were implicitly encouraged to ‘facilitate the reach’ rather than ignore or ‘not resist’  
384 a perturbation. Active engagement in attaining movement’s goal may be necessary for invoking  
385 preparatory proprioceptive control. Overall, our center-out reaching paradigm reflects more  
386 closely the multi-joint delayed-reach paradigm commonly used by studies of CNS preparatory  
387 activity. Very recently, it has been shown that elbow-actuating muscles exhibit SLR responses  
388 that are tuned to the position of the hand relative to a single target, rather than the state of the  
389 muscles themselves<sup>41</sup>. Although this does indicate a higher level of sophistication by spinal  
390 monosynaptic circuits than previously thought, the differing SLR responses were a function of the  
391 different configurations of the limb, whereas the goal of the task (i.e., location of the target)  
392 remained the same across experimental conditions. In contrast, in our study we were able to

393 isolate an effect of external goal (visual target) on stretch reflex gains by varying target location  
394 while maintaining the state of the limb constant across conditions of interest.

395 The current findings highlight that muscle spindle receptors and their independent motor system  
396 can serve more decisive and task-dependent roles in sensorimotor control than generally  
397 thought. Traditionally, the spindle organ has been seen as a peripheral mechanoreceptor that  
398 provides reliable information about a muscle's kinematic state. An interesting recent proposition  
399 is that the mechanoreceptive part of spindles responds best to force-related rather than length-  
400 related variables, as shown in passive ('electrically quiescent') muscles<sup>15</sup>. Indeed, when  
401 performing continuous active sinusoidal movements with a single digit in the presence of external  
402 loads, we have also shown that spindle afferent activity from digit extensors best encodes a  
403 combination of velocity and net external mechanical force<sup>42</sup>. But our more recent work examining  
404 spindle responses in visuomotor learning (i.e., visuomotor rotation) revealed fundamental  
405 changes in spindle output as a function of task stage (e.g., encoding position vs. velocity in the  
406 'washout' stage), with no fundamental differences in mechanical state across the task's stages<sup>16</sup>.  
407 Besides indicating that the fusimotor system is a specific contributor in visuomotor learning, the  
408 aforementioned study showed that spindle output can be modified based on changes in the  
409 visual environment alone. This is in line with the findings of the current study (e.g., Fig. 2b-c).  
410 Very recent spindle afferent recordings during passive movement of the foot also indicate that  
411 visual feedback can affect spindle output<sup>43</sup>. Accumulating evidence therefore suggests that  
412 human spindles can transcend their traditionally-ascribed role as mechanoreceptors invariably  
413 encoding some muscle state regardless of context or goal. The traditional account also  
414 essentially assumes the purpose of fusimotor control is to ensure that spindles keep functioning  
415 as a reliable mechanoreceptors, as described by the textbook version of 'alpha-gamma co-  
416 activation'<sup>44</sup>. In cats, it has been shown that spindles can receive a different 'fusimotor-set'<sup>45</sup>  
417 depending on the behavior the animal is engaged in (i.e., primarily variations of standing or gait  
418 in different contexts), but the specific benefit of the different fusimotor sets has been unclear, and  
419 these sets generally seem to reflect the alertness state of the animal. Here, we show spindle gain  
420 modulation as a function of visually-determined goals within the same behavior (reaching),  
421 including evidence of how this spindle tuning can promote motor performance (i.e., Figs. 4-9).

422 The traditional view of spindles as mundane proprioceptive sensors is the one currently adopted  
423 by prevalent computational frameworks of sensorimotor control<sup>46-50</sup>. Part of these suggest that  
424 our brain predicts the sensory consequences of action and then compares internal predictions  
425 and actual incoming sensory signals ('sensory cancellation'), with no discrepancy between the  
426 two indicating agency of action. With regard to primary muscle spindles in the context of planned  
427 reaching movements, our results suggest that the nervous system does more than these  
428 computational frameworks describe. Presumably still based on internal models and predictions of  
429 future outcomes given an intention or goal<sup>49,50</sup>, the system seems able to proactively choose and  
430 implement a change in sensory feedback gains at source (e.g., Fig. 2-3). That is, in planned  
431 voluntary reach, the 'controller' can proactively modify the 'plant' (i.e., adjust sensitivity of the  
432 plant's sensors) in order to prevent consequences (negative feedback) that would otherwise  
433 interfere with execution of the intended action. Beyond its role in planned reaching, the  
434 independent and direct control of sensors via  $\gamma$  motor neurons may well constitute an important  
435 overarching third dimension in sensorimotor control, in addition to (i) top-down processes leading  
436 to  $\alpha$  motor neuron control and, (ii) the selective gating and internal processing of sensory signals.  
437 Understanding the full potential and implications of this neglected third dimension in active  
438 behaviors will be a major focus of our future work. By demonstrating advantageous tuning of  
439 spindles in movement preparation, the current study supports the notion of a 'third way' in which  
440 the nervous system can exert goal-dependent sensorimotor control.

## 441 Methods

### 442 Human participants

443 We recorded afferent activity from 9 adults in the first experiment (mean age of 27 and SD = 3  
444 years; 5 were male), 14 individuals took part in the second experiment utilizing a robotic  
445 manipulandum platform (mean age of 24.5 and SD = 4 years; 6 were male), and an additional 12  
446 adults participated in the third experiment utilizing the same platform (mean age = 25 and SD = 5  
447 years; 5 were female). All participants reported having no motor or cognitive disabilities, had  
448 normal or corrected vision, gave their written consent before taking part and were financially  
449 compensated. The current experiments were part of research programs approved by the  
450 Regional Ethics Committee of Umeå and followed the Declaration of Helsinki regarding research  
451 with humans.



## 452 **Experimental setups**

### 453 *Microneurography platform*

454 The participants were seated reclined on an adjustable chair with their right forearm resting on a  
455 cushion. The activity in single afferents from wrist or digit actuator muscles was recorded along  
456 with wrist joint kinematics and EMG activity from relevant forearm muscles (Fig. 1a). Participants  
457 used their right hand in order to perform a classic center-out reaching task, where each target is  
458 first cued before a 'Go' cue to move is issued (the task is described in more detail below). A  
459 clamp proximal to the wrist stabilized the upper arm and helped prevent electrode dislocations,  
460 but hand movements about the wrist were fully unrestrained in this setup. In 'classic' center-out  
461 reaching tasks, target location is normally presented on a monitor and so is the visual feedback  
462 on the location of the hand, represented by a moving cursor. The approach was the same here:  
463 visual feedback was provided by a monitor that was placed across from the participants and  
464 elevated at about their eye-level. They controlled the 2D location of a cursor on the monitor  
465 through wrist movements recorded by a FASTRAK® sensor attached to the dorsal surface of the  
466 hand with double-sided tape. The initial posture of the hand represented a neutral wrist position  
467 which in turn corresponded to the 'origin' position of the cursor (Fig. 1a). In this neutral position,  
468 the hand (e.g., third metacarpal joint) was aligned with the long axis of the forearm, and to hold  
469 this position against gravity the participants had to produce a constant low-level contraction  
470 mainly in the extensor carpi radialis. Wrist radial/ulnar rotations controlled cursor movements in  
471 the vertical visual axis and flexion/extension controlled cursor movements in the horizontal axis  
472 (Fig. 1a). One degree movement at the wrist corresponded to 0.7 cm on-screen movement of the  
473 visual cursor. Visual targets not involved in an ongoing trial were represented as light brown  
474 circle outlines (1.5 cm radius; origin outline had 1 cm radius). The targets were placed  
475 symmetrically around the origin in 45° intervals so that movements in all major directions were  
476 induced (Fig. 1a). The distance between the center of the origin and the center of a target was  
477 12°, but a minimum wrist movement of 10° was required for successfully reaching from origin to  
478 target (i.e., edge to edge).

### 479 *Robotic platform*

480 Here the participants were seated upright on an adjustable chair and their right hand grasped the  
481 handle of a robotic manipulandum (Fig. 5a; KINARM end-point robot, BKIN Technologies, CA).  
482 Although not displayed in Figure 5a, the participant's right forearm was placed inside a thin

483 cushioning foam structure attached to a custom-made airsled; this structure supported the  
484 participant's forearm and allowed frictionless movement of the arm in a 2D plane. A piece of  
485 leather fabric with Velcro attachments was wrapped tightly around the forearm and hand,  
486 reinforcing the mechanical connection between the airsled, the handle and the hand. This  
487 attachment also fixated the hand so it remained immobile about the wrist and straight (i.e.,  
488 aligned with the forearm) throughout the experiment. The forces exerted by the participant's right  
489 hand were measured by a six-axis force transducer (Mini40-R, ATI Industrial Automation)  
490 embedded in the handle, and the system also generated kinematic data with regard to the  
491 position of the handle. The KINARM also produced controlled forces on the hand, both for the  
492 background (pre-) loading of muscles and for creating position-controlled mechanical  
493 perturbations. Surface EMG was concurrently recorded from seven muscles actuating the right  
494 arm (see the relevant section for more details). Visual feedback was very similar to that  
495 presented in the microneurography experiment, but in the robotic platform visual stimuli were  
496 displayed in the plane of movement by way of a one-way mirror, on which the contents of a  
497 monitor were projected. The participants had no direct vision of their hand (Fig. 5a), but position  
498 of the hand was visually represented by a white dot ('cursor'; 1 cm diameter). Targets not  
499 involved in an ongoing trial were displayed as circle outlines (1.2 cm radius; origin outline had  
500 0.65 cm radius). The targets were placed symmetrically at a distance of 9 cm from the origin.

## 501 **Specific experimental procedures**

### 502 *Microneurography – hand movement task*

503 In the behavioral task associated with microneurography, the participants (n=9) were instructed  
504 to place the cursor inside the origin circle and wait there immobile before a trial could start. After  
505 a random wait period (0.5 - 2.5 sec), one of the eight different targets would suddenly turn from a  
506 circle outline to a filled red circle of the same size. This indicated which target the participant had  
507 to reach once the 'Go' cue appeared. The 'Go' cue in this case was the red target suddenly  
508 turning into a green outline of the same size. For the majority of the participants (7/9), the time  
509 between onset of the target cue (red circle) and onset of the 'Go' cue was a fixed 1.5 sec  
510 ('preparatory period'). To assess whether any major afferent firing patterns during movement  
511 preparation were critically sensitive to major characteristics of the particular preparatory period,  
512 we used 1 sec as the preparatory period with one participant, and 1.5 sec + random time (1-500  
513 ms) for another. No substantial differences in firing patterns were found between these afferents

514 and the rest Ia. To aid subsequent analyses, data from the initial 1.5 sec were used in the latter  
515 case, and in the former case the data during the 1 sec periods were resampled offline to 1.5 sec.  
516 In all experiments, the participants were instructed to initiate the reach movement promptly upon  
517 onset of the 'Go' cue and to move at a naturalistic speed. To promote this behavior, participants  
518 received visual feedback on their performance upon reaching a target. That is, they received the  
519 message "Good" if they managed to reach the target within 1 sec following onset of the 'Go' cue  
520 and "Fail" if they took longer. After receiving feedback, the participants returned to the origin to  
521 initiate the next trial. The task continued until the afferent recording was lost due to an accidental  
522 dislocation of the electrode, an all too common occurrence when recording during naturalistically  
523 fast active movement (but at least 24 trials i.e., three blocks of trials were recorded with each  
524 afferent; see below for more details). Trials where movement was initiated prematurely (i.e.,  
525 before the 'Go' cue) were excluded from analyses, but these represented just one trial per  
526 afferent on average, and in no case more than two trials per recorded afferent. To familiarize the  
527 participants with the center-out task and promote good performance at it during  
528 microneurography, they practiced the task for ~10 minutes before microneurography began.

#### 529 *Robotic platform – arm movement tasks*

530 Two experiments were conducted using a robotic platform (experiment '2' and '3'), with each  
531 experiment employing a different set of participants. Before the main task of either experiment,  
532 each participant initially performed a brief unperturbed center-out reaching task that was very  
533 similar to that during microneurography. This introductory task was included in order to establish  
534 a closer link between the behavioral task in microneurography and the main task applied with the  
535 robotic platform (described below). Specifically, in this brief center-out task, participants were  
536 instructed to bring the hand in the origin circle and remain there immobile. After a wait period of  
537 one sec + random time (1-500 ms), one of the eight peripheral targets/outlines turned into a filled  
538 red circle of the same size, indicating which target the participant had to reach once the 'Go' cue  
539 appeared ('Go' = target turning green). The 'preparatory period' here was a fixed 1.5 sec, to  
540 match the case during microneurography. Participants had to move at a naturalistic speed and  
541 upon reaching a target they received visual feedback on their performance. Counting from the  
542 onset of the 'Go' cue, the feedback was "Too Slow" if the reach movement lasted >1400 ms,  
543 "Too Fast" if <400 ms, and "Correct" if the movement duration was in-between the two stated  
544 extremes. After receiving feedback, the participants returned to the origin to initiate the next trial.

545 There were 80 trials in total (i.e., 10 repetitions x 8 targets), presented in a block-randomized  
546 manner, with one set of eight different targets representing a 'block'. The task lasted ~5 minutes.

547 Following a short break of a few minutes, the participants then performed the main behavioral  
548 task. In experiment '2' (e.g., Figs. 5-6), the main task lasted for ~1 hour, whereas in experiment  
549 '3' (e.g., Fig. 8) the task lasted ~1.5 hours. The main task was designed to emphasize reflex  
550 responses from shoulder actuators, allowing the possibility to extend positive findings to the most  
551 proximal areas of the upper limb, although elbow muscle reflexes were also stimulated.  
552 Specifically, visual feedback in the main behavioral task of experiment '2' was the same as in the  
553 brief introductory task described above, except that two rather than eight targets were employed  
554 (Fig. 5a-b) and the cursor position was frozen for the duration of haptic perturbations. Before  
555 each trial began, the participants brought the hand (i.e., cursor) inside the origin circle. After a  
556 wait of one sec + random time (1-500 ms), the robotic arm was programmed to elicit a slow-rising  
557 4N load (rise-time 800 ms, 1200 ms hold-time) in the front-and-left direction ('135°' direction) or  
558 right-and-back direction ('315°' direction), or no load was applied. A substantial load could  
559 therefore be present at this point in each trial, with the function of pushing towards one or the  
560 other target (Fig. 5a-b). Because the participants were instructed to maintain their hand in the  
561 middle of the origin circle during this phase of the trial, the ultimate purpose of this maneuver was  
562 loading/unloading of the recorded actuators, primarily the posterior deltoid or pectoralis and  
563 anterior deltoid. After an additional 1.2 sec where the full force of the load was countered while  
564 the hand remained still, one of the targets was cued by becoming a red filled circle. After a  
565 preparatory period of either 0.25, 0.75 or 1.25 sec, a position-controlled perturbation of the hand  
566 occurred (3.5 cm displacement, 150 ms rise time, no hold period), swiftly moving the hand  
567 towards the middle of one or the other group of targets i.e., in the 135° or 315° direction. The  
568 specific preparatory delays were chosen to match the middle of epochs '1-3', as identified in Fig.  
569 2b-c. The haptic perturbations were designed to induce the kinematics of a fast naturalistic point-  
570 to-point movement (i.e., approximate bell-shaped velocity profile; e.g., see Fig. 5c-e) and  
571 promote stretch reflex responses primarily in shoulder muscles. The robot was allowed to employ  
572 maximum available stiffness (~40,000 N/m) -if necessary- to achieve the desired kinematics on  
573 every trial. The KINARM robot was able to reliably impose the required hand kinematics during  
574 these perturbations regardless of background load/force conditions. When the haptic perturbation  
575 ended (i.e., 150 ms after perturbation onset), the 'Go' cue suddenly appeared and the

576 participants swiftly reached to this highlighted target. The trial ended when the participants kept  
577 their hand immobile inside the target for 0.3 sec, after which they received visual feedback on  
578 their performance (i.e., “Correct”, “Too Fast” or “Too Slow”), as per the brief introductory task.  
579 The participants then returned their hand to the origin to initiate the next trial. Each block of trials  
580 represented one repetition of each level of each condition (i.e., block = 36 trials: 2 targets x 2  
581 perturbation directions x 3 preparatory periods x 3 load conditions) and there were 15 repetitions  
582 of the complete trial block; that is, the total number of trials was 540. The trials were presented in  
583 a block-randomized manner, and therefore all perturbations were unpredictable to the  
584 participants in terms of their timing (onset) and direction. The participants had the opportunity to  
585 take a short break at the end of each block of trials. ‘Experiment 3’ was essentially the same as  
586 ‘Experiment 2’ except that six targets were used rather than two, and the two preparatory delays  
587 were 0.2 and 1.2 sec, also referred to as ‘short’ and ‘long’. Each block of trials represented one  
588 repetition of each level of each condition (i.e., block = 72 trials: 6 targets x 2 perturbation  
589 directions x 2 preparatory periods x 3 load conditions) and there were 10 repetitions of the  
590 complete trial block; that is, the total number of trials was 720.

### 591 **Muscle afferent recordings**

592 Single spikes in afferents originating from either the radial wrist extensor (*extensor carpi radialis*),  
593 the ulna wrist extensor (*extensor carpi ulnaris*) or the common digit extensor (*extensor digitorum*  
594 *communis*) were obtained using the technique of microneurography<sup>51</sup>. The radial nerve of the  
595 right arm was targeted, and isolated single action potentials were categorized as originating from  
596 spindle or Golgi tendon organ afferents following standard procedures described in detail  
597 elsewhere<sup>17,18,42</sup>. In total, 12 muscle spindle afferents (8 ‘type Ia’ and 4 ‘type II’) and 3 Golgi  
598 tendon organ afferents were recorded from 9 participants (minimum of one recorded afferent per  
599 included participant). With all afferents a minimum of 24 movement trials were recorded (i.e., 3  
600 repetitions of a movement direction) and with some the recording lasted longer, allowing for more  
601 repetitions to be sampled.

602 As expected, the primary spindle afferents responded with higher overall firing rates to dynamic  
603 muscle stretch than muscle shortening. Just one afferent from a digit actuator was not  
604 responsive to one of the three ‘stretch’ target directions (i.e., upper left direction) but was very  
605 responsive to the other two stretch directions. Likely causes for such variability include the

606 particular set of fusimotor supply and the precise location of the spindle organ inside the muscle.  
607 The number of afferents recorded in this study reflects that in previous studies examining single  
608 afferent activity during active movement e.g.,<sup>16,42,52</sup>. Moreover, it has been shown that a small  
609 number of spindle afferents can provide a reliable representation of the firing patterns observed  
610 in the underlying afferent population e.g.,<sup>14</sup>. This is not surprising, as all muscle spindle organs  
611 are placed mechanically “in parallel” with the skeletal muscle fibers, and the spindle acts as an  
612 integrator of activity from multiple fusimotor fibers.

### 613 **Muscle EMG recordings**

614 In the microneurography experiment, custom-build surface electrodes ( $\varnothing$  2 mm; 12 mm apart)  
615 were used for recording EMG from the common digit extensor and digit flexor muscles, as well  
616 as from the four main wrist actuators (extensor carpi radialis, extensor carpi ulnaris, flexor carpi  
617 radialis and flexor carpi ulnaris). The location of each electrode on the forearm was chosen using  
618 a hand-held stimulator probe and isometric contraction/relaxation maneuvers. In experiment ‘2’  
619 and ‘3’, the Delsys Bagnoli system (DE-2.1– Single Differential Electrodes) was used to record  
620 surface EMG from the pectoralis, posterior deltoid and the anterior deltoid. We also recorded  
621 EMG from the brachioradialis, biceps and triceps areas. In all experiments, EMG electrodes were  
622 coated with conductive gel and attached to the skin using double-sided tape.

### 623 **Data sampling and processing**

624 The data generated during the microneurography experiment were sampled digitally using  
625 SC/ZOOM™. Single action potentials were identified semi-automatically under visual control. The  
626 EMG channels recorded during microneurography were root-mean-square processed with a rise-  
627 time constant of 1.0 ms and a decay-time constant of 3.0 ms; they were then digitally sampled at  
628 1600 Hz. The EMG channels were high-pass filtered with a fifth-order, zero-phase-lag  
629 Butterworth filter with a 30 Hz cutoff. Kinematic and force data from the KINARM platform were  
630 sampled at 1 KHz. The recorded EMG signals were band-pass filtered online through the Delsys  
631 EMG system (20-450Hz) and sampled at 2 kHz. This EMG data was also high-pass filtered with  
632 a fifth-order, zero phase-lag Butterworth filter with a 30 Hz cutoff and then rectified. To be able to  
633 compare and combine EMG and afferent data across muscles and participants, the raw data  
634 were normalized (z-transformed), similar to the procedure described elsewhere<sup>16,36,42,53</sup>. Briefly,  
635 for each individual muscle (or individual afferent), all relevant raw data traces were concatenated,

636 and a grand mean and standard deviation was generated. These two numbers were then used to  
637 produce the normalized 'raw' EMG data for each muscle or produce the normalized firing rate of  
638 each afferent (i.e., by subtracting the grand mean and then dividing by the standard deviation).  
639 Exemplary untreated raw data are also presented (Fig. 1b-c). For plotting purposes alone,  
640 continuous firing rate signals were smoothed using 10 ms moving window (i.e., Fig. 2b) and a 5  
641 ms moving window was used for EMG signals (e.g., Fig. 6). Throughout, data tabulations were  
642 performed using Matlab® (MathWorks, Natick, MA, USA).

### 643 **Procedures for statistical analyses**

644 The main statistical approach involved conducting repeated-measures t-tests and ANOVA, and  
645 complementary planned comparisons on kinematic, EMG and normalized spindle firing rate data  
646 observed during the preparatory periods (experiment '1'), and single sample t-tests on EMG data  
647 pertaining to spinal and long-latency stretch reflex responses elicited during haptic perturbations  
648 (experiment '2' & '3'). Specifically, with regard to the analysis of the afferent data, it is known that  
649 kinematic variables such as position (i.e., muscle length) and its derivatives as well as spindle-  
650 bearing EMG activity can affect spindle output, with muscle velocity (i.e., first derivative of muscle  
651 length) believed to normally exert the largest influence. To generate estimates of muscle length  
652 (tendon excursion) from the recorded wrist angular data we used established physiological  
653 models<sup>54,55</sup> as done previously elsewhere<sup>16-18</sup>. The impact of kinematic and EMG variables on  
654 primary spindle afferent output during movement was examined by performing a forward step-  
655 wise regression using population signals (i.e., grand mean of median responses from single  
656 participants/neurons; Fig. 3). However, as expected, kinematic and EMG variables represented  
657 very small levels of variability during the main period of interest (i.e., immobile hand during the  
658 preparatory period; Supplementary Fig. 1). The main analyses of data from 'Experiment 1'  
659 examined potential effects of the goal/target of each trial (i.e., prospective movement direction:  
660 muscle stretch vs. shortening) during movement preparation, and no systematic variation in  
661 kinematic variables or EMG was found as a function of goal (Supplementary Fig. 2).

662 To investigate the impact of goal we grouped different trials into those associated with clear  
663 stretch vs. clear shortening of the spindle-bearing muscle (Fig. 2a) based on the aforementioned  
664 physiological models, but this grouping is nevertheless intuitive and straightforward (e.g., for the  
665 radial wrist extensor, targets requiring wrist flexion and/or ulna deviation were classified as

666 'muscle stretch' targets). For each single afferent, the normalized raw data across trials were first  
667 aligned to the onset of the target cue. To more clearly isolate possible changes in firing rate as a  
668 function of target, the median firing rate observed during the 0.5 sec period before target onset  
669 ('baseline') was subtracted from the entire firing rate signal on a trial by trial basis. The firing rate  
670 signals were collapsed across trials in order to get a single averaged (median) response signal  
671 for each afferent and target group (i.e., 'stretch' vs. muscle 'shortening' targets). Averaging  
672 across all afferent signals for each target group gave an estimate of population responses (Fig.  
673 2b). From each averaged afferent signal, the data points used in statistical tests (ANOVA / t-test)  
674 were the median value across each of three epochs of equal length, termed 'Epoch 1', '2' and '3'  
675 (Fig. 2b-c). The data-points pertaining to individual spindle afferents (i.e., Fig. 2c) were entered  
676 into a two-way repeated-measures ANOVA, of the design 2 (goal/direction) x 3 (Epoch). Single-  
677 sample t-tests, planned comparisons and simple linear correlations were also performed. The  
678 same single-sample t-test analyses were also performed with kinematic and EMG data, as  
679 described in the Results section.

680 With regard to stretch reflex responses to haptic perturbations (i.e., experiment '2' & '3'), the  
681 analyses focused on established time-periods known to reflect the output of spinal and  
682 supraspinal stretch reflex circuits. Specifically, across all experiments, the onset of movement or  
683 kinematic perturbation was defined as the point where movement velocity (i.e., 1<sup>st</sup> derivative of  
684 Euclidean displacement) exceeded 5% of peak velocity during the perturbation phase (note the  
685 position-controlled perturbations had an approximate bell-shaped velocity profile). Using the  
686 onset of the kinematic perturbation to signify time zero, the spinal stretch reflex response (SLR)  
687 is defined as that occurring in the epoch 25 – 50 ms post perturbation, whereas the long-latency  
688 reflex response (LLR a.k.a. "R3") is defined as that occurring in the epoch 75 – 100 ms post  
689 perturbation e.g.,<sup>23,41</sup>. The magnitude of the SLR and LLR response was representative of  
690 changes in gain, as the same input (perturbation) was provided when the hand was at a common  
691 start position. An epoch of the same length as the SR one was used for representing pre-  
692 perturbation muscle activity (i.e., -25 – 0 ms). Unlike the case of the behavioral task during  
693 microneurography, the participants received no prior training in the main behavioral task with the  
694 robot. As the situation of interacting with a robot that perturbs one's hand on every trial is also  
695 less than completely naturalistic, the initial five repetitions of each trial type were considered to  
696 be 'familiarity' trials and were excluded from analyses; excluding a number of initial trials is a



697 common approach in similar robot-based sensorimotor control studies, e.g.,<sup>56</sup>. In experiment ‘2’,  
698 three preparatory delays were used (.25, .75 and 1.25 sec), reflecting the middle of each of the  
699 three epochs used for analyses in experiment ‘1’ (Fig. 2b). As expected from the afferent findings  
700 (Fig. 2c), visual inspection on EMG signals confirmed that a similar suppression of spinal SR  
701 occurred for the two longer delays (e.g., Fig. 5c-e represents trials where the delay was 0.75). The  
702 data were therefore collapsed across the two delays, to represent one ‘long’ delay condition (Fig.  
703 6a-h). The relevant data used in statistical analyses for each participant were generated by first  
704 creating averages (medians) of EMG signals across repetitions of a relevant trial type that  
705 involved stretch of the particular muscle (i.e., EMG signals during muscle shortening were not  
706 analyzed in the current study as we were interested in stretch reflex responses). The average  
707 value within the epoch of interest was then taken, producing a single data-point per muscle and  
708 trial type. To simplify analyses (i.e., concentrate on the main manipulation of interest while  
709 accounting for known effects of e.g., muscle loading), for each individual muscle, EMG data of a  
710 particular load and/or delay were contrasted in terms of the target goal, generating a single data  
711 point that was ultimately used for statistical analyses as part of a single-sample t-test (see e.g.,  
712 Fig. 6d, 6h and 7).

713 All statistical comparisons were two-tailed, and the overall baseline statistical significance level  
714 was 0.05. Tukey’s HSD test was used for any post-hoc analyses. No statistical methods were  
715 used for pre-determining sample sizes but the sizes used are similar to those reported in  
716 previous studies. Data normality was confirmed using the Shapiro-Wilks test for samples with  
717 <50 data-points and Lilliefors test for larger samples. Statistical tests were performed using either  
718 MATLAB® (MathWorks, Natick, MA, USA) or STATISTICA® (StatSoft Inc, USA).

719

## References

- 720 1 Kurata, K. Premotor cortex of monkeys: set- and movement-related activity reflecting  
721 amplitude and direction of wrist movements. *J Neurophysiol* **69**, 187-200,  
722 doi:10.1152/jn.1993.69.1.187 (1993).
- 723 2 Messier, J. & Kalaska, J. F. Covariation of primate dorsal premotor cell activity with direction  
724 and amplitude during a memorized-delay reaching task. *J Neurophysiol* **84**, 152-165,  
725 doi:10.1152/jn.2000.84.1.152 (2000).

- 726 3 Shen, L. & Alexander, G. E. Preferential representation of instructed target location versus  
727 limb trajectory in dorsal premotor area. *J Neurophysiol* **77**, 1195-1212,  
728 doi:10.1152/jn.1997.77.3.1195 (1997).
- 729 4 Tanji, J. & Evarts, E. V. Anticipatory activity of motor cortex neurons in relation to direction of  
730 an intended movement. *J Neurophysiol* **39**, 1062-1068, doi:10.1152/jn.1976.39.5.1062  
731 (1976).
- 732 5 Churchland, M. M. *et al.* Neural population dynamics during reaching. *Nature* **487**, 51-56,  
733 doi:10.1038/nature11129 (2012).
- 734 6 Churchland, M. M., Cunningham, J. P., Kaufman, M. T., Ryu, S. I. & Shenoy, K. V. Cortical  
735 preparatory activity: representation of movement or first cog in a dynamical machine?  
736 *Neuron* **68**, 387-400, doi:10.1016/j.neuron.2010.09.015 (2010).
- 737 7 Michaels, J. A., Dann, B., Intveld, R. W. & Scherberger, H. Neural Dynamics of Variable  
738 Grasp-Movement Preparation in the Macaque Frontoparietal Network. *J Neurosci* **38**, 5759-  
739 5773, doi:10.1523/JNEUROSCI.2557-17.2018 (2018).
- 740 8 Pasquereau, B. & Turner, R. S. Dopamine neurons encode errors in predicting movement  
741 trigger occurrence. *J Neurophysiol* **113**, 1110-1123, doi:10.1152/jn.00401.2014 (2015).
- 742 9 Rosenbaum, D. A. Human movement initiation: specification of arm, direction, and extent. *J*  
743 *Exp Psychol Gen* **109**, 444-474, doi:10.1037//0096-3445.109.4.444 (1980).
- 744 10 Ghez, C. *et al.* Discrete and continuous planning of hand movements and isometric force  
745 trajectories. *Exp Brain Res* **115**, 217-233, doi:10.1007/pl00005692 (1997).
- 746 11 Haith, A. M., Pakpoor, J. & Krakauer, J. W. Independence of Movement Preparation and  
747 Movement Initiation. *J Neurosci* **36**, 3007-3015, doi:10.1523/JNEUROSCI.3245-15.2016  
748 (2016).
- 749 12 Matthews, P. B. C. in *Mammalian muscle receptors and their central actions* 195-262  
750 (Edward Arnold Publishers Ltd, 1972).
- 751 13 Hasan, Z. & Houk, J. C. Transition in sensitivity of spindle receptors that occurs when  
752 muscle is stretched more than a fraction of a millimeter. *J Neurophysiol* **38**, 673-689,  
753 doi:10.1152/jn.1975.38.3.673 (1975).
- 754 14 Prochazka, A. in *Exercise: Regulation and integration of multiple systems* Vol. 12 (eds L.  
755 Rowell & J. T. Shepherd) 89-127 (American Physiological Society, 1996).
- 756 15 Blum, K. P., Lamotte D'Incamps, B., Zytnicki, D. & Ting, L. H. Force encoding in muscle  
757 spindles during stretch of passive muscle. *PLoS computational biology* **13**, e1005767,  
758 doi:10.1371/journal.pcbi.1005767 (2017).
- 759 16 Dimitriou, M. Enhanced muscle afferent signals during motor learning in humans. *Curr Biol*  
760 **26**, 1062-1068, doi:10.1016/j.cub.2016.02.030 (2016).

- 761 17 Dimitriou, M. & Edin, B. B. Discharges in human muscle spindle afferents during a key-  
762 pressing task. *J. Physiol.* **586**, 5455-5470 (2008).
- 763 18 Dimitriou, M. & Edin, B. B. Discharges in human muscle receptor afferents during block  
764 grasping. *J. Neurosci.* **28**, 12632-12642 (2008).
- 765 19 Marsden, C. D., Merton, P. A. & Morton, H. B. Servo action in the human thumb. *J Physiol*  
766 **257**, 1-44 (1976).
- 767 20 Matthews, P. B. Observations on the automatic compensation of reflex gain on varying the  
768 pre-existing level of motor discharge in man. *J Physiol* **374**, 73-90,  
769 doi:10.1113/jphysiol.1986.sp016066 (1986).
- 770 21 Pruszynski, J. A., Kurtzer, I., Lillicrap, T. P. & Scott, S. H. Temporal evolution of "automatic  
771 gain-scaling". *J Neurophysiol* **102**, 992-1003 (2009).
- 772 22 Pruszynski, J. A. & Scott, S. H. Optimal feedback control and the long-latency stretch  
773 response. *Exp Brain Res* **218**, 341-359 (2012).
- 774 23 Scott, S. H. The computational and neural basis of voluntary motor control and planning.  
775 *Trends Cogn. Sci.* **16**, 541-549 (2012).
- 776 24 Scott, S. H. A functional taxonomy of bottom-up sensory feedback processing for motor  
777 actions. *Trends Neurosci* **39**, 512-526, doi:10.1016/j.tins.2016.06.001 (2016).
- 778 25 Fellows, S. J., Domges, F., Topper, R., Thilman, A. F. & Noth, J. Changes in the short- and  
779 long-latency stretch reflex components of the triceps surae muscle during ischaemia in man.  
780 *J Physiol* **472**, 737-748, doi:10.1113/jphysiol.1993.sp019970 (1993).
- 781 26 Yang, L., Michaels, J. A., Pruszynski, J. A. & Scott, S. H. Rapid motor responses quickly  
782 integrate visuospatial task constraints. *Exp Brain Res* **211**, 231-242, doi:10.1007/s00221-  
783 011-2674-3 (2011).
- 784 27 Burke, D., McKeon, B., Skuse, N. F. & Westerman, R. A. Anticipation and fusimotor activity  
785 in preparation for a voluntary contraction. *J Physiol* **306**, 337-348,  
786 doi:10.1113/jphysiol.1980.sp013400 (1980).
- 787 28 Fetz, E. E., Perlmutter, S. I., Prut, Y., Seki, K. & Votaw, S. Roles of primate spinal  
788 interneurons in preparation and execution of voluntary hand movement. *Brain Res Brain*  
789 *Res Rev* **40**, 53-65 (2002).
- 790 29 Prut, Y. & Fetz, E. E. Primate spinal interneurons show pre-movement instructed delay  
791 activity. *Nature* **401**, 590-594, doi:10.1038/44145 (1999).
- 792 30 Shenoy, K. V., Sahani, M. & Churchland, M. M. Cortical control of arm movements: a  
793 dynamical systems perspective. *Annu Rev Neurosci* **36**, 337-359, doi:10.1146/annurev-  
794 neuro-062111-150509 (2013).

- 795 31 Soteropoulos, D. S. Corticospinal gating during action preparation and movement in the  
796 primate motor cortex. *J Neurophysiol* **119**, 1538-1555, doi:10.1152/jn.00639.2017 (2018).
- 797 32 Wurtz, R. H. & Albano, J. E. Visual-motor function of the primate superior colliculus. *Annu*  
798 *Rev Neurosci* **3**, 189-226, doi:10.1146/annurev.ne.03.030180.001201 (1980).
- 799 33 Dorris, M. C., Olivier, E. & Munoz, D. P. Competitive integration of visual and preparatory  
800 signals in the superior colliculus during saccadic programming. *J Neurosci* **27**, 5053-5062,  
801 doi:10.1523/JNEUROSCI.4212-06.2007 (2007).
- 802 34 Sprague, J. M. Neural mechanisms of visual orienting responses. *Prog Brain Res* **112**, 1-15,  
803 doi:10.1016/s0079-6123(08)63317-8 (1996).
- 804 35 Hagbarth, K. E. EMG studies of stretch reflexes in man. *Electroencephalogr Clin*  
805 *Neurophysiol*, Suppl 25:74-29 (1967).
- 806 36 Dimitriou, M. Task-dependent modulation of spinal and transcortical stretch reflexes linked  
807 to motor learning rate. *Behavioral neuroscience* **132**, 194-209, doi:10.1037/bne0000241  
808 (2018).
- 809 37 Kakuda, N. & Nagaoka, M. Dynamic response of human muscle spindle afferents to stretch  
810 during voluntary contraction. *J Physiol* **513**, 621-628 (1998).
- 811 38 Pruszynski, J. A. *et al.* Primary motor cortex underlies multi-joint integration for fast  
812 feedback control. *Nature* **478**, 387-390 (2011).
- 813 39 Kurtzer, I. L., Pruszynski, J. A. & Scott, S. H. Long-latency reflexes of the human arm reflect  
814 an internal model of limb dynamics. *Curr Biol* **18**, 449-453 (2008).
- 815 40 Pruszynski, J. A., Kurtzer, I. & Scott, S. H. The long-latency reflex is composed of at least  
816 two functionally independent processes. *J Neurophysiol* **106**, 449-459,  
817 doi:10.1152/jn.01052.2010 (2011).
- 818 41 Weiler, J., Gribble, P. L. & Pruszynski, J. A. Spinal stretch reflexes support efficient hand  
819 control. *Nat Neurosci* **22**, 529-533, doi:10.1038/s41593-019-0336-0 (2019).
- 820 42 Dimitriou, M. Human Muscle Spindle Sensitivity Reflects the Balance of Activity between  
821 Antagonistic Muscles. *J Neurosci* **34**, 13644-13655, doi:10.1523/JNEUROSCI.2611-14.2014  
822 (2014).
- 823 43 Ackerley, R., Chancel, M., Aimonetti, J. M., Ribot-Ciscar, E. & Kavounoudias, A. Seeing  
824 your foot move changes muscle proprioceptive feedback. *eNeuro* **6**,  
825 doi:10.1523/ENEURO.0341-18.2019 (2019).
- 826 44 Vallbo, A. B. Discharge patterns in human muscle spindle afferents during isometric  
827 voluntary contractions. *Acta Physiol Scand* **80**, 552-566 (1970).

- 828 45 Prochazka, A., Hulliger, M., Zangger, P. & Appenteng, K. 'Fusimotor set': new evidence for  
829 alpha-independent control of gamma-motoneurons during movement in the awake cat.  
830 *Brain Res* **339**, 136-140 (1985).
- 831 46 Franklin, D. W. & Wolpert, D. M. Computational mechanisms of sensorimotor control.  
832 *Neuron* **72**, 425-442 (2011).
- 833 47 Shergill, S. S., Bays, P. M., Frith, C. D. & Wolpert, D. M. Two eyes for an eye: the  
834 neuroscience of force escalation. *Science* **301**, 187 (2003).
- 835 48 Wolpert, D. M. & Ghahramani, Z. Computational principles of movement neuroscience. *Nat*  
836 *Neurosci* **3 Suppl**, 1212-1217 (2000).
- 837 49 Wolpert, D. M., Ghahramani, Z. & Jordan, M. I. An internal model for sensorimotor  
838 integration. *Science* **269**, 1880-1882 (1995).
- 839 50 Wolpert, D. M. & Miall, R. C. Forward Models for Physiological Motor Control. *Neural Netw*  
840 **9**, 1265-1279 (1996).
- 841 51 Vallbo, A. B. & Hagbarth, K. E. Mechnoreceptor activity recorded from human peripheral  
842 nerves. *Electroencephalogr Clin Neurophysiol* **25**, 407 (1968).
- 843 52 Vallbo, A. B. & al-Falahe, N. A. Human muscle spindle response in a motor learning task. *J.*  
844 *Physiol.* **421**, 553-568 (1990).
- 845 53 Dimitriou, M., Franklin, D. W. & Wolpert, D. M. Task-dependent coordination of rapid  
846 bimanual motor responses. *J Neurophysiol* **107**, 890-901 (2012).
- 847 54 Elliot, D. & McGrouther, D. A. The excursions of the long extensor tendons of the hand. *J*  
848 *Hand Surg Br* **11**, 77-80 (1986).
- 849 55 Pigeon, P., Yahia, L. & Feldman, A. G. Moment arms and lengths of human upper limb  
850 muscles as functions of joint angles. *J Biomech* **29**, 1365-1370 (1996).
- 851 56 Dimitriou, M., Wolpert, D. M. & Franklin, D. W. The temporal evolution of feedback gains  
852 rapidly update to task demands. *J Neurosci* **33**, 10898-10909 (2013).

## Acknowledgements

853  
854 This work was supported by grants awarded to M.D. by the Kempe Foundation, the local  
855 Foundation for Medical Research ("Insamlingsstiftelsen") and the Swedish Research Council  
856 (project 2016-02237). The funders had no role in study design, data collection and analysis,  
857 decision to publish or preparation of the manuscript.

858

## Author contributions

859 M.D. conceptualized and designed the study, M.D. collected the neural data, M.D. and S.P.  
860 analyzed the data, interpreted the results and wrote the manuscript.

861

## Competing interests

862 The authors declare no competing interests.

863

Figures with legends follow on the next page

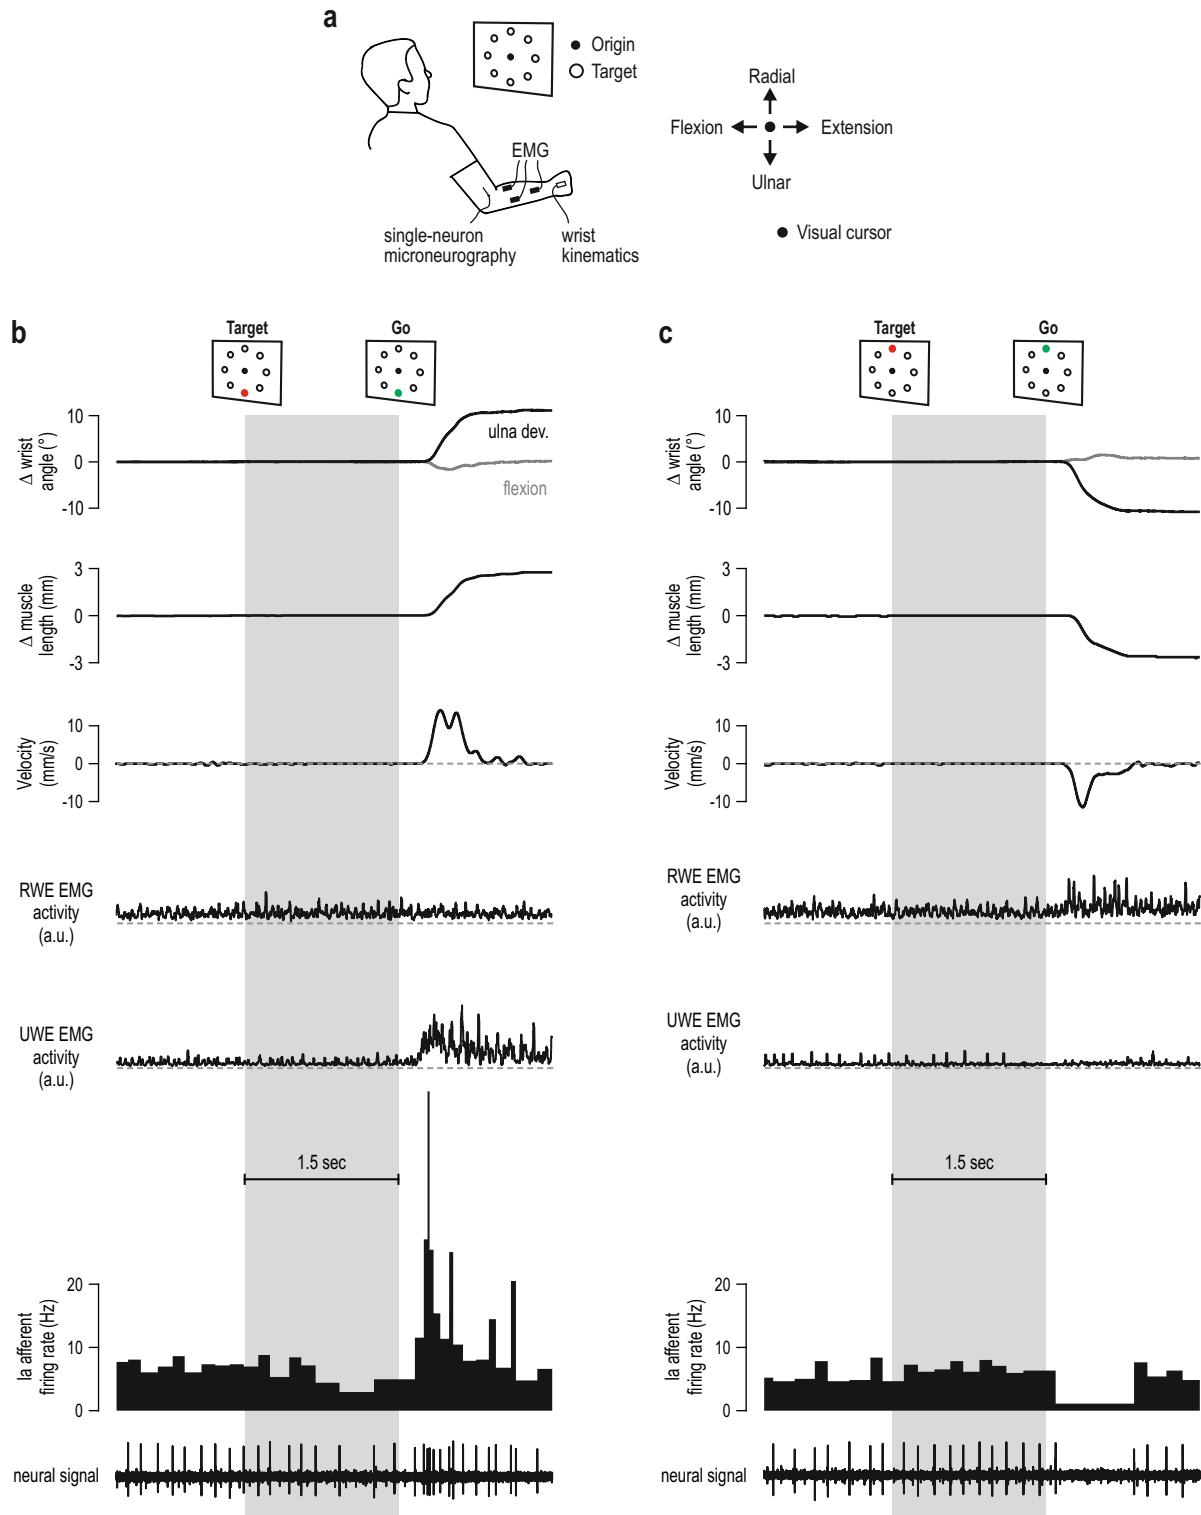

**Fig. 1: First experimental setup and representative single trial data.**

**a** The general setup of experiment '1'. Participants were asked to perform the classic delayed-reach task using their right hand. From an initial semi-pronated position, wrist flexion-extension moved a visual cursor in the horizontal dimension and wrist ulna-radial deviation moved the cursor in the vertical dimension. **b** Representative data from a single trial where reaching the target required ulna deviation of the wrist. Muscle length and velocity estimates pertain to the spindle-bearing muscle, which in this case is the Radial Wrist Extensor (RWE; i.e., *extensor carpi radialis*). Also shown is surface EMG from the Ulna Wrist Extensor muscle (UWE i.e., *extensor carpi ulnaris*) which mostly powered the reaching movement. Despite no overt changes in kinematics or EMG during the preparatory period (grey background), primary spindle afferent ('la') responses decreased, particularly at the latter half of this period. **c** The same neuron as 'b' but here the target was in the opposite direction, requiring radial deviation at the wrist and therefore shortening of the RWE. No decrease in firing rate was observed during the preparatory period. Throughout, dashed grey lines represent zero values.

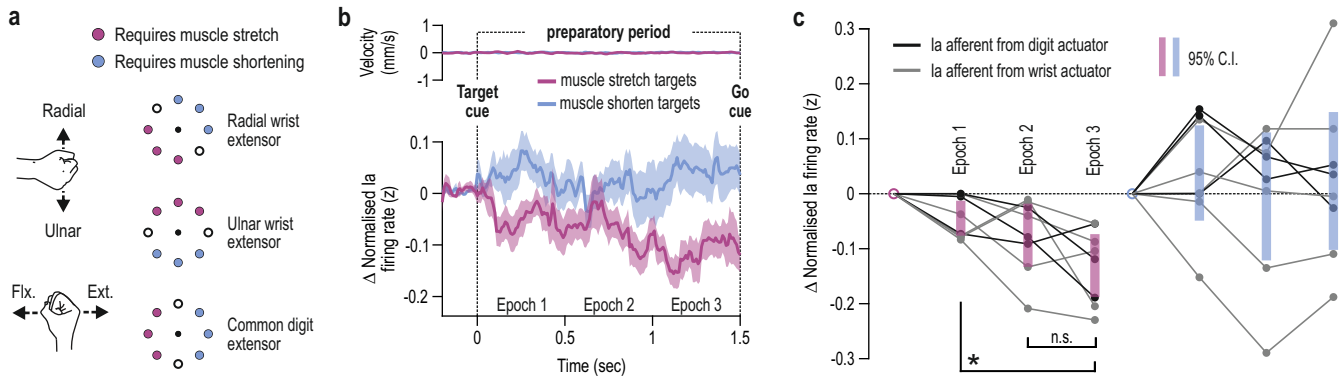

**Fig. 2: Goal-dependent tuning of muscle spindle receptors during movement preparation.**

**a** The visual targets were categorized based on whether reaching them required stretching or shortening of the spindle-bearing muscle. According to published physiological models for each muscle (see Methods), six targets represented clear and substantial change in muscle length, whereas two 'intermediate' targets (circle outlines) represented little or no muscle stretch or shortening. **b** Top panel represents mean stretch velocity of the recorded spindle-bearing muscles, essentially indicating no overt movement occurred in the preparatory period (see e.g., velocity scales in Fig. 1b-c and Supplementary Fig. 1). The bottom panel represents mean change in primary spindle afferent ('Ia') firing rates. All traces are aligned to onset of the target cue (time '0'). Purple and blue traces represent targets associated with stretch and shortening of the spindle-bearing muscle, respectively. Shading represents  $\pm 1$  s.e.m. **c** Average Ia firing rates in the three epochs ('1-3') as shown in 'b'. Thin grey lines represent individual Ia afferents from wrist extensor muscles and thin black lines represent Ia afferents from digit extensors. The shaded bars represent 95% confidence intervals and \*  $p < 0.05$  following paired t-test. Same color scheme is used throughout. Goal-dependent decreases in tonic Ia firing rate may reflect a decrease in 'dynamic' fusimotor output to spindles; such fusimotor supply is known to have a much stronger effect on the spindles' sensitivity to dynamic muscle stretch (i.e., gain).



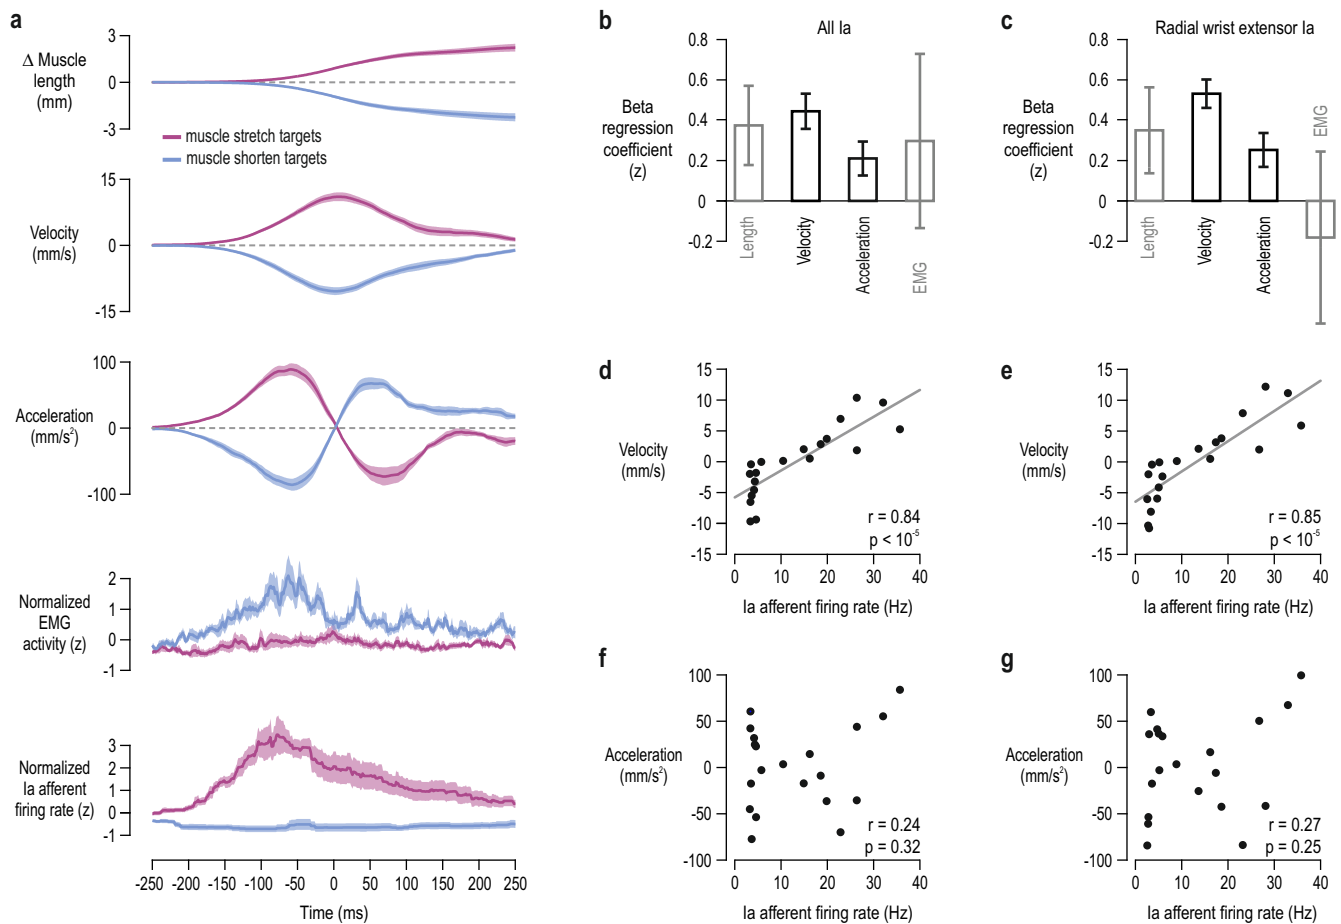

**Fig. 3: Muscle spindle receptors are relatively insensitive to acceleration during delayed reaching.**

**a** Type Ia population responses and associated spindle-bearing muscle kinematics and EMG. The signals were generated by averaging (mean) across the median responses of participants with whom a single afferent was recorded. Shading represents  $\pm 1$  s.e.m. Signals are aligned to peak velocity (time '0'). **b** We used spindle-bearing muscle length, velocity, acceleration and EMG in a single regression as predictors of afferent firing rate (i.e., data shown in 'a', but down-sampled with a 50 ms moving average). 'Beta' regression coefficients are shown for facilitating comparison across predictors; these coefficients reflect the degree of change in the dependent variable (in units of s.d.) given a 1 s.d. change in the predictor variable. Error bars represent  $\pm 1$  s.e.m. Black represents a statistically significant impact ( $p < 0.05$ ). **c** As 'b' but for spindle afferents originating from the Radial Wrist Extensor (RWE) muscle alone. Both velocity and acceleration were significant predictors but the impact of acceleration on Ia firing rate is  $\sim$ half of that observed when performing reaching movements in the absence of a preparatory period ( $\beta > 0.5$ ; see<sup>17</sup>). **d-e** As expected, there was a strong significant relationship between velocity and type Ia firing rates across all recorded Ia afferents ('d') and those of the RWE alone ('e'). **f-g** There was no significant relationship between acceleration and firing rate across all recorded Ia afferents ('f'), nor with those from the RWE ('g').

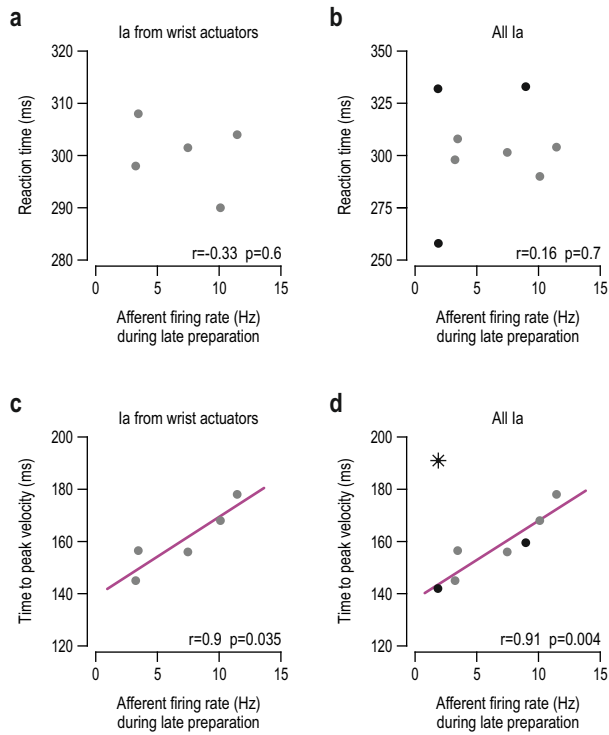

**Fig. 4: Spindle firing rates at late movement preparation predict performance during reaching.**

Throughout, each data point represents the average (median) value of a single participant/afferent across trials where reaching the target required stretch of the spindle-bearing muscle. The left column of panels pertains to wrist muscles (grey dots), and the right represents all Ia afferents, including those originating from digit extensor muscles (black). **a-b** The horizontal axes represent Ia firing rates during the late preparation epoch (i.e., epoch '3' as defined in Figure 2b) and vertical axes represent reaction time i.e., the time between onset of the Go cue and onset of the reaching movement. **c** The vertical axes represent time between onset of reaching and the initial peak velocity of reaching movement; there was a strong positive relationship with tonic Ia firing from muscles engaged in powering hand movement in the current task (i.e., wrist actuators). **d** With the exception of one participant/afferent (black star), movement performance was well described by the same relationship (i.e., 3 ms delay in attaining peak velocity for every additional spike/sec). The relationship between spindle Ia responses at late preparation and subsequent reaching performance can be understood in terms of the spindle's role in negative feedback circuits (i.e., stretch 'reflexes').

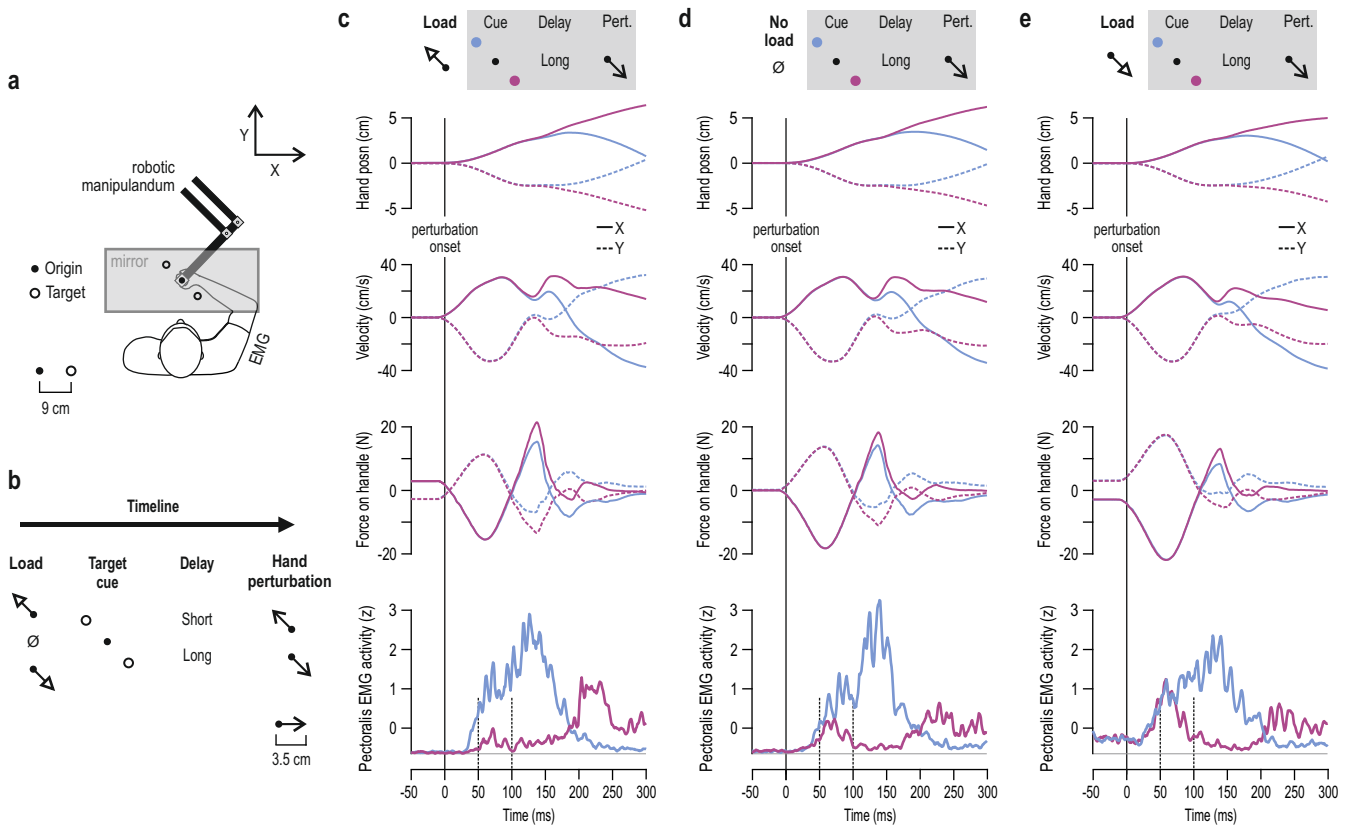

**Fig. 5: The second experiment and representative data from a single participant.**

**a** The general setup of experiment '2'. Participants held the graspable end of a robotic manipulandum. Vision was directed at a one-way mirror, on which the contents of a monitor were projected. Hand position was represented by a visual cursor. Although not shown here, the right forearm rested on an air-sled and the hand was immobile around the wrist (see Methods for more details). **b** The timeline of experimental manipulations. Each trial begun by slowly loading the hand in the upper left direction (i.e., -X and +Y direction) or lower right direction (+X and -Y), or there was no load ('null' load). The participants had to maintain the hand immobile at origin despite any loading. One of two visual targets was then suddenly cued (turned red) and this state lasted for a relatively short delay (250 ms) or long delay (750 or 1250 ms; see Methods). These preparatory delays correspond to the middle of epochs '1-3' (Fig. 2b-c). At the end of the delay the hand was rapidly perturbed towards or in the opposite direction of the cued target. The perturbation lasted for 150 ms; at its end the 'Go' signal was given (cued target turned green) and movement to the target had to be completed. Cursor position was frozen during the perturbation. Trials were block-randomized, hence perturbation direction was unpredictable even after experiencing a particular load and cue. **c-e** Relevant median signals from a single participant when perturbations stretched the pectoralis muscle following a 750 ms preparatory delay, after first applying a load in the direction of pectoralis shortening ('c'), when there was no external load ('d') and when applying a load in the direction of pectoralis stretch, promoting increased pectoralis activity for maintaining the start position ('e'). Data are aligned to the onset of the position-controlled haptic perturbation (time '0'), defined as the point where movement speed reached 5% of initial peak value.

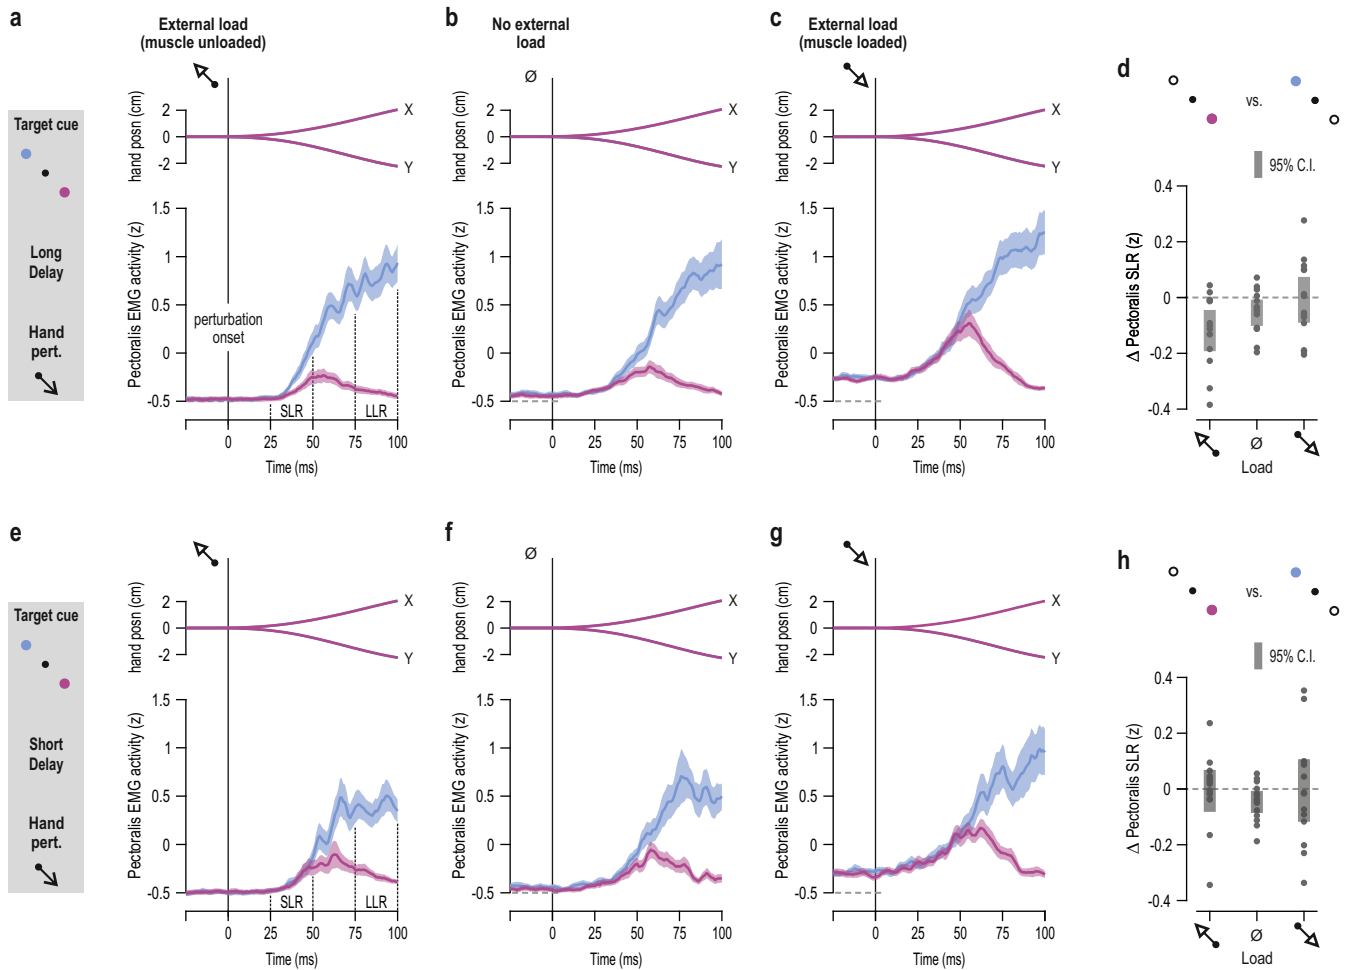

**Fig. 6: The goal- and delay-dependent modulation of stretch reflex gains is congruent with the preparatory tuning profile of muscle spindles**

Mean hand position (posn.) and mean rectified pectoralis EMG activity across participants (N=14) when an external (pre-)load was applied in the direction of pectoralis shortening (a), when there was no external load (b; but note increased EMG levels prior to time '0' due to co-contraction), and when an external load was applied in the direction of pectoralis stretch (c). Shading represents  $\pm 1$  s.e.m. Data are aligned to the onset of the haptic perturbation (time '0'). As the schematic on the far left indicates, the data represent trials where the preparatory delay was relatively long and the subsequent perturbation stretched the pectoralis. SLR denotes the epoch associated with the spinal stretch reflex and LLR the epoch associated with the long-latency stretch reflex or "R3" (for LLR analyses see Results and Fig. 7). **d** Difference in mean pectoralis EMG activity (purple minus blue) in the spinal SLR epoch, corresponding to the data shown in 'a-c'. Dots represent individual participants and thick vertical lines represent 95% confidence intervals. The SLR of the unloaded pectoralis is suppressed in a goal-dependent manner ('a'), this relative suppression effect remains but weakens when the muscle is loaded by self-imposed co-contraction ('b') and goal-dependent modulation of SLR disappears when the muscle is strongly pre-loaded ('c'). It is known that SLR responses are affected by load-based or "automatic" gain-scaling but goal-dependent LLR responses are largely not affected by background load. Indeed, here there are consistent effects of goal and delay length on LLR responses regardless of load condition (see also Fig. 7). **e-h** As top row of panels but representing trials where the preparatory delay was relatively short (0.25 sec).

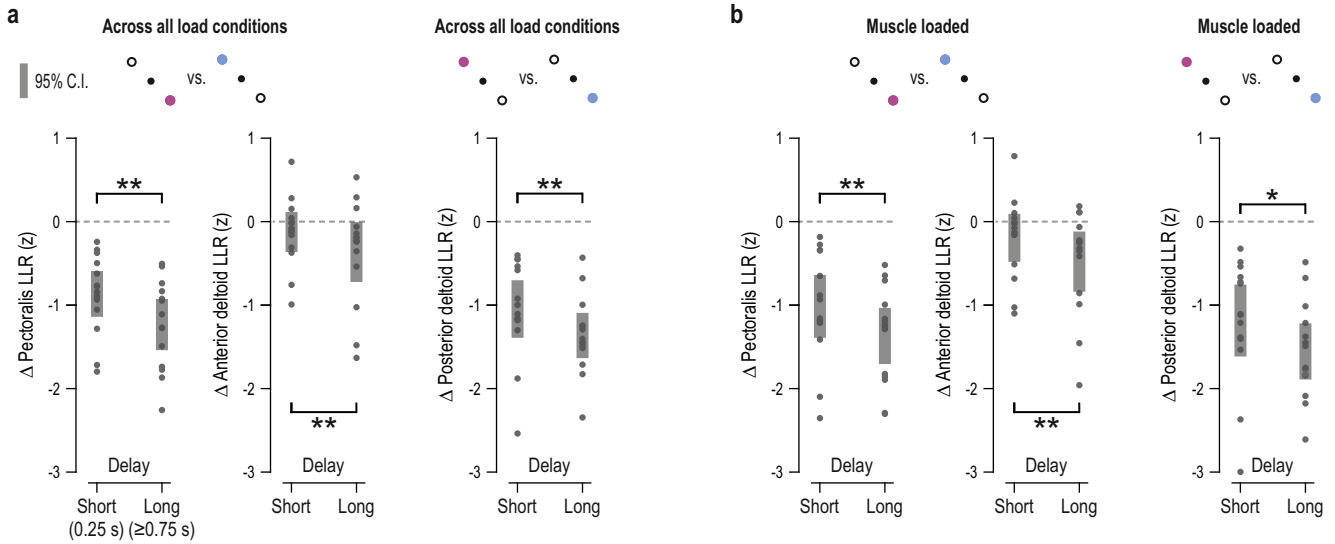

**Fig. 7: LLR gains reflect the stronger goal-dependent suppression of spindle signals observed at the latter parts of the preparatory delay**

Goal-dependent difference in EMG responses of all recorded shoulder muscles at the LLR epoch (e.g., see Fig. 6), with regard to the relatively 'short' (250 ms) and 'long' ( $\geq 750$  ms) preparatory delays used in experiment '2'. More negative values indicate stronger goal-appropriate behavior (i.e., relative suppression of stretch reflex gains for muscles that must stretch when reaching the cued target). Throughout, each data point represents the average value of a different participant ( $N=14$ ) and thick vertical lines represent 95% confidence intervals. Stars indicate p values following a within-measures t-test, with double stars indicating  $p < 0.01$  and single  $p < 0.05$ . These results demonstrate a weaker goal-dependent modulation of LLRs when the preparatory delay is 'short', regardless if contrasted across all load conditions (a), or only for the cases where the muscle was externally loaded i.e., the load was applied in the direction of muscle stretch (b). The 'short' delay here was 250 ms, which is substantially longer than the previously reported minimum delay for inducing full expression of goal-dependent LLR responses following perturbations about the elbow (i.e., 150 ms; see main text). In contrast, the effect of delay length on LLR gains is congruent with the temporal evolution of spindle suppression (i.e., significantly stronger at the latter parts of preparation; Fig. 2c).

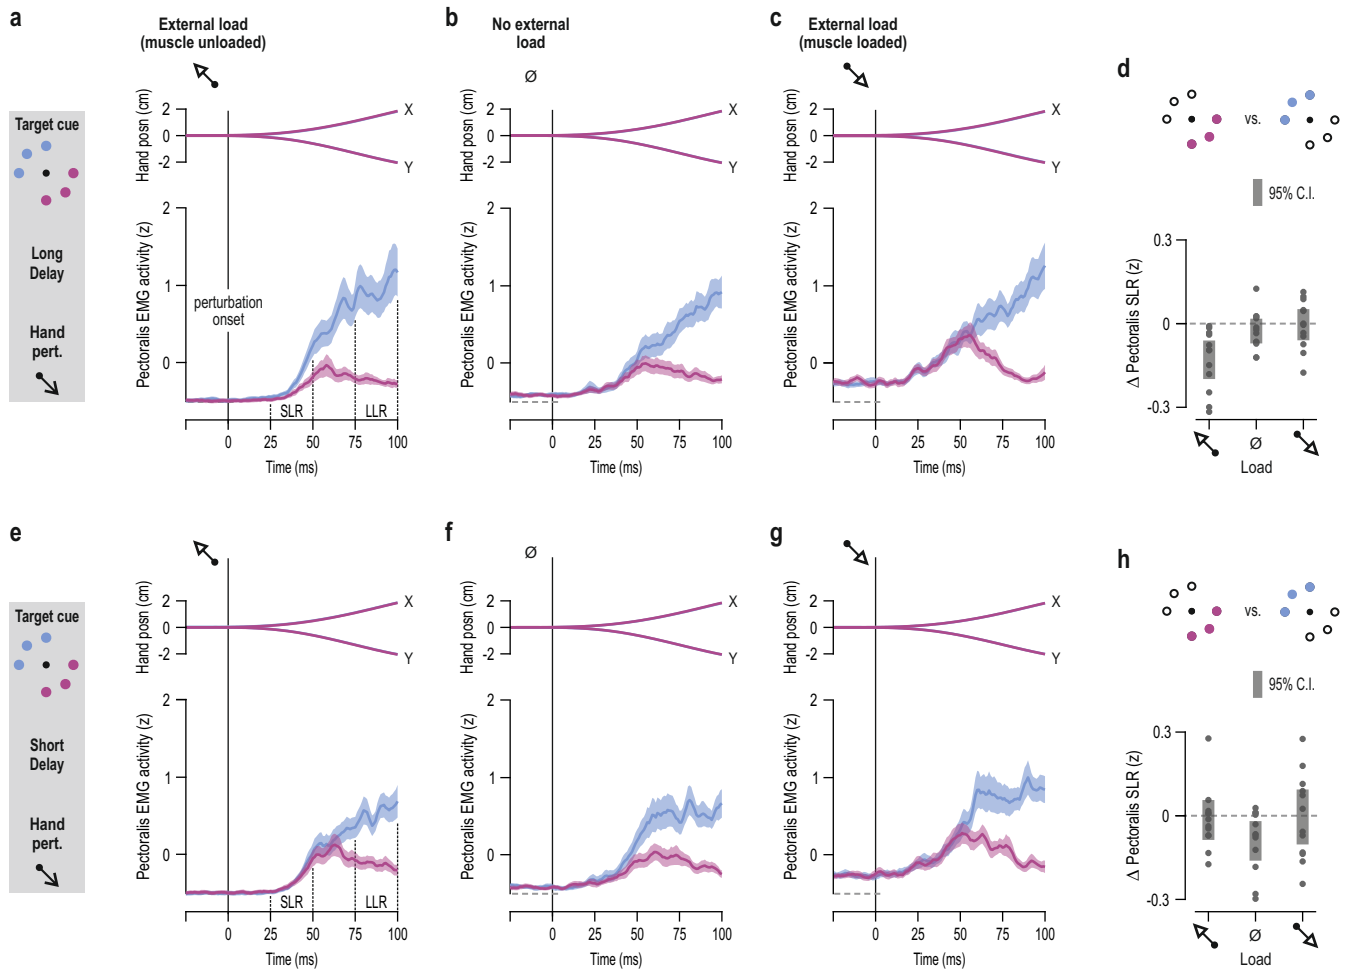

**Fig. 8: Third experiment utilizing a larger workspace also demonstrates congruent preparatory tuning of stretch reflex gains.**

Experiment '3' was conducted as per experiment '2' (Figs. 5-6) except in this case six targets were employed rather than two (see left schematics) and the long and short preparatory delays were 1.2 and 0.2 sec, respectively. **a-c** Mean hand position (posn.) and mean rectified pectoralis EMG activity across participants (N=12), when an external load was applied in the direction of pectoralis shortening (**a**), when there was no external load (**b**; but note increased EMG levels prior to time '0' due to co-contraction), and when the load was applied in the direction of pectoralis stretch (**c**). The data represent trials where the preparatory delay was relatively long and the subsequent perturbation stretched the pectoralis. Shading represents  $\pm 1$  s.e.m. SLR denotes the epoch associated with the spinal stretch reflex and LLR the epoch associated with the long-latency stretch reflex (see main text for LLR analyses). **d** Difference in mean pectoralis EMG activity (purple minus blue) in the SLR epoch, corresponding to the data shown in 'a-c'. Dots represent individual participants and thick vertical lines represent 95% confidence intervals. **e-h** As the top row of panels but representing trials where the preparatory delay was relatively short.

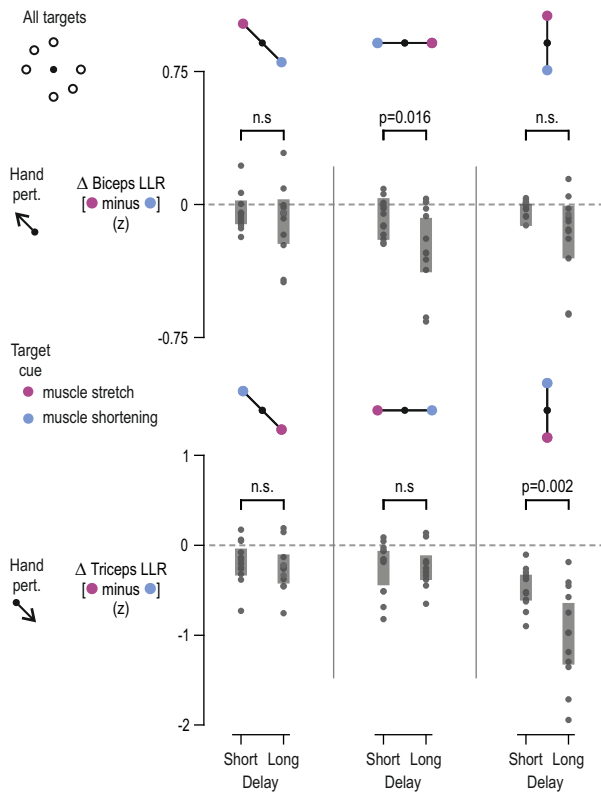

**Fig. 9: LLR gains of biceps and triceps are also suppressed as a function of delay when a larger workspace is involved**

As Figure 7, but here the z-normalized EMG data originate from Experiment '3', where six targets were used (i.e., three axes of motion: vertical, horizontal and diagonal). The data are collapsed across all load conditions. More negative values indicate stronger goal-appropriate behavior (i.e., relative suppression of stretch reflex gains for muscles that must stretch when reaching the target). Throughout, each data-point represents a different participant and thick vertical lines represent 95% confidence intervals. p values resulted from within-measures t-tests. As the case in 'Experiment '2', the LLR responses of biceps and triceps were not significantly different as a function of delay length when preparing to reach targets along the diagonal axis (left column; only axis used in Experiment '2'). However, such effects are observed for the biceps brachii and triceps lateralis when preparing to act along the horizontal axis (middle column) and vertical axis (right column), respectively. This suggests that the larger workspace employed in experiment '3' (vs. '2') induced goal-dependent proprioceptive control of a larger group of muscles, including elbow flexor and extensor muscles. The EMG traces pertaining to the significant triceps result are shown in Supplementary Figure 6.

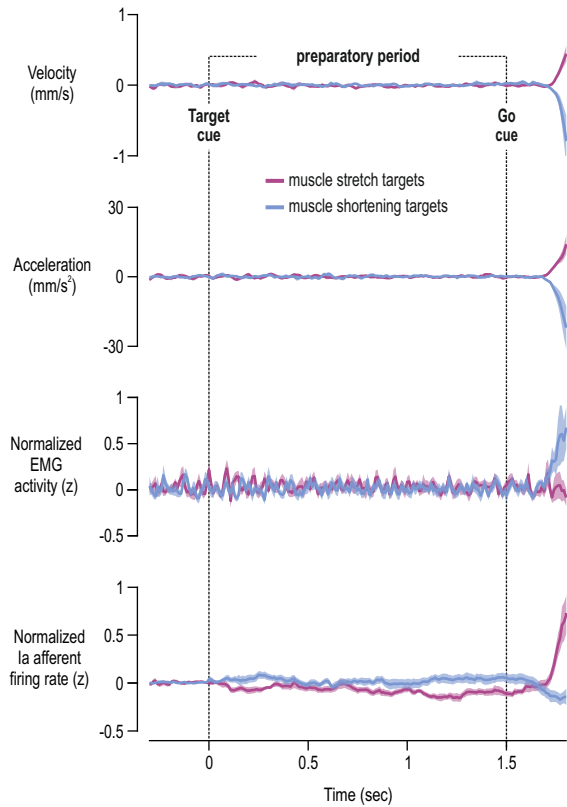

**Supplementary Figure 1: Population signals before, during and after movement preparation**

Mean stretch velocity, acceleration, EMG and spindle type Ia signals across all recorded spindle-bearing muscles. The traces are aligned to onset of the target cue (time '0') as per Figure 2b. Purple and blue traces represent targets associated with stretch and shortening of the spindle-bearing muscle, respectively. Shading represents  $\pm 1$  s.e.m. Here, signals are also shown for the short period (0.3 sec) following onset of the Go signal where reaching movement begun to occur.



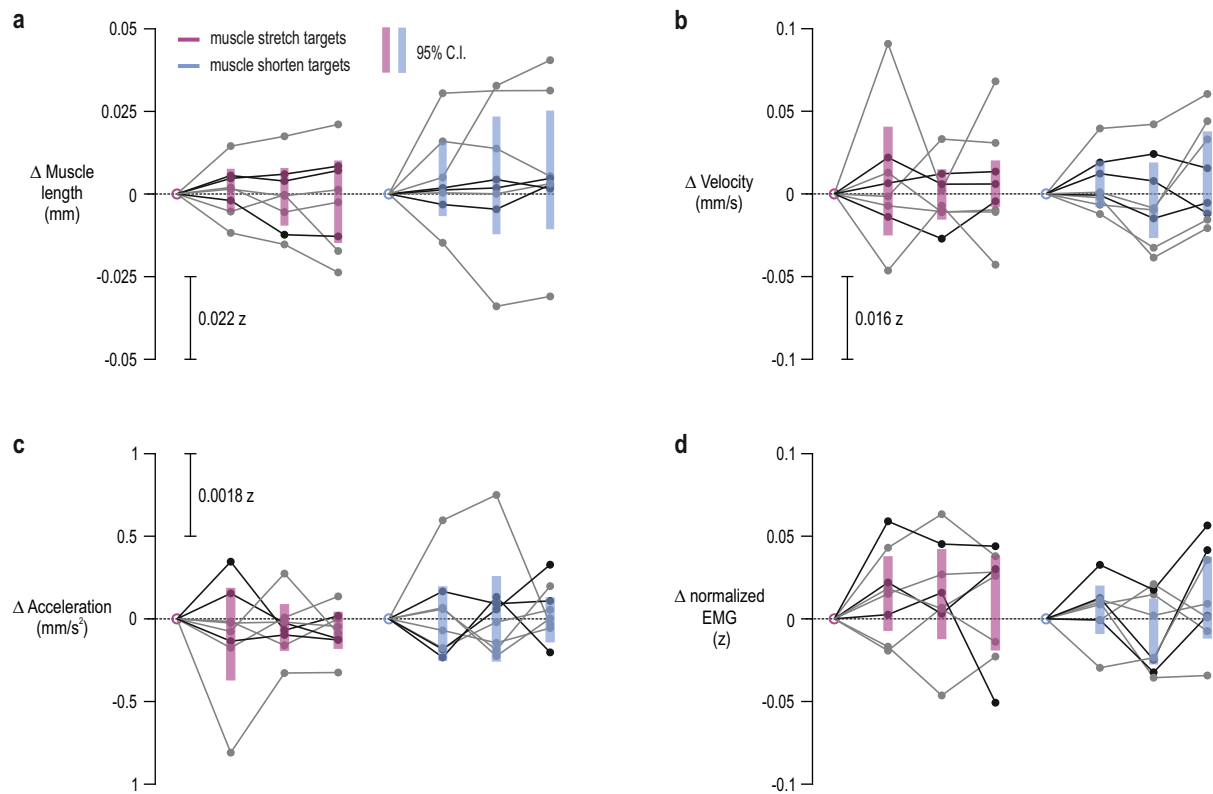

**Supplementary Fig. 2: Very small deviations in kinematic signals and variability in EMG during preparation are unrelated to spindle tuning.** a-d, Spindle-bearing muscle length, velocity, acceleration and EMG, respectively, corresponding to the afferent data presented in Figure 2c. Thin grey lines represent data from individual wrist extensor muscles and thin black lines represent data from digit extensors. The shaded bars represent 95% confidence intervals. The same color scheme is used throughout. As expected, deviations in these variables were minor and, importantly, none of the groups systematically differed from baseline, and no trends similar to those observed in Ia firing were seen (i.e., purple epoch '3' < epoch '1'; Fig. 2c). Scales of normalized values (z) are also shown, reinforcing that deviations in these variables during preparation were very small compared to the changes observed across the full duration of the delayed-reach task (see also Fig. 3b-c).

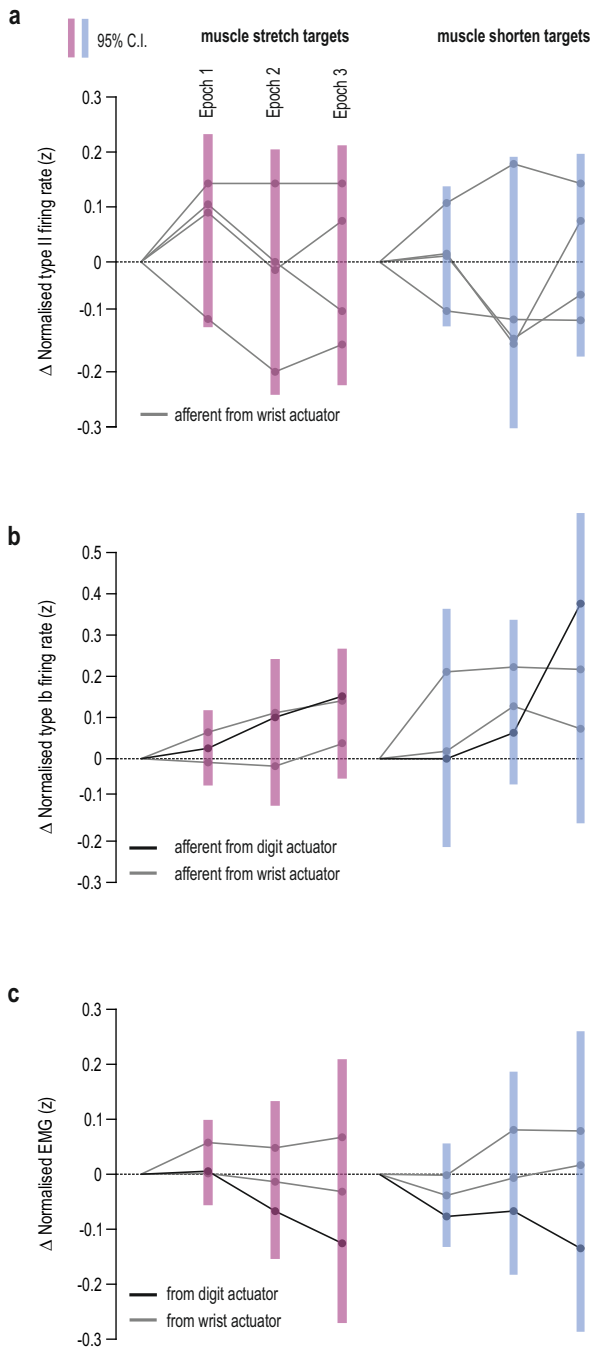

**Supplementary Figure 3: Type II and type Ib responses during movement preparation.**

**a** As Figure 2c but representing secondary muscle spindle afferents ('type II'). **b** Same format as 'a' but representing afferent activity from Golgi tendon organ afferents ('type Ib'). **c** Same format as 'b' but representing Golgi-bearing muscle EMG.

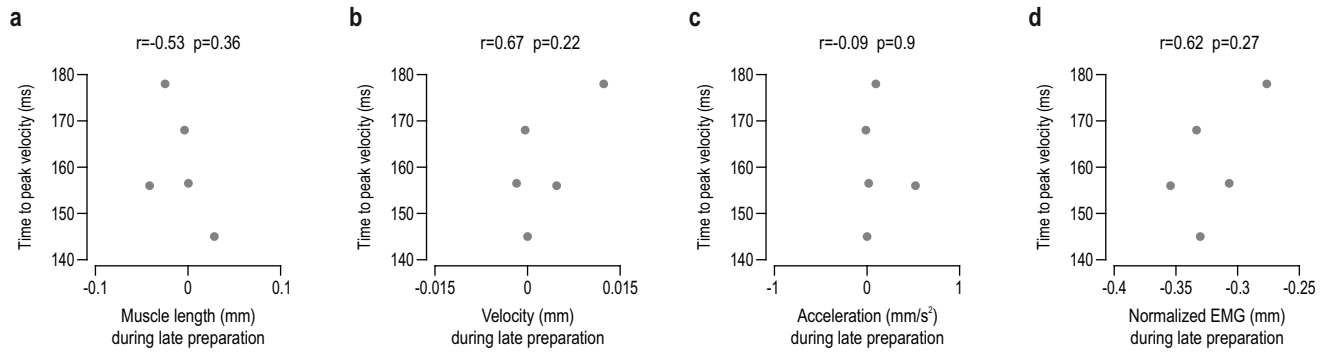

**Supplementary Figure 4: Kinematic signals and EMG at late movement preparation do not predict time to peak velocity.**

As Figure 4c but horizontal axes pertain to spindle-bearing muscle length (a), velocity (b), acceleration (c), and EMG (d). There was no significant relationship between any of these variables and time to peak velocity during reaching.

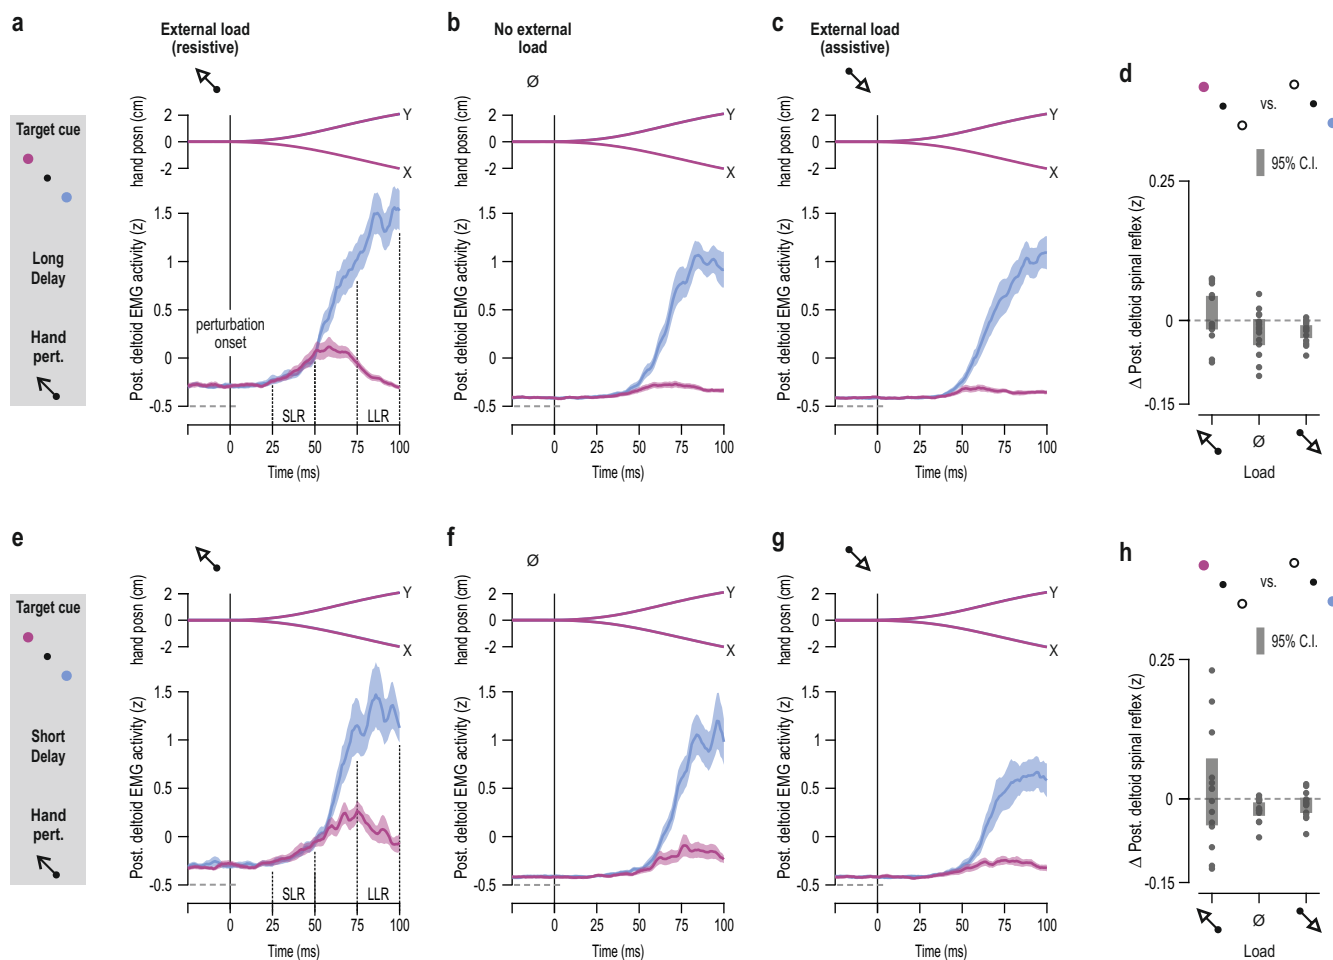

**Supplementary Figure 5: Equivalent goal- and delay-dependent effects on stretch reflex gains of the posterior deltoid.**

**a-c** Mean hand position (posn.) and mean rectified posterior deltoid EMG activity across participants when an external (pre-)load was applied in the direction of posterior deltoid stretch ('a'), when there was no external load ('b'), and when the load was applied in the direction of posterior deltoid shortening ('c'). Shading represents  $\pm 1$  s.e.m. As the schematic on the far left indicates, the data here represent trials where the preparatory delay was relatively long and the subsequent perturbation stretched the posterior deltoid. SLR denotes the epoch associated with the spinal stretch reflex and LLR the epoch associated with the long-latency stretch reflex (for LLR analyses see Fig. 7). **d** There was a consistent pattern of SLR modulation, equivalent to that observed for the pectoralis (i.e., Fig. 6d). **e-h** As top row of panels but representing trials where the preparatory delay was relatively short (250 ms).

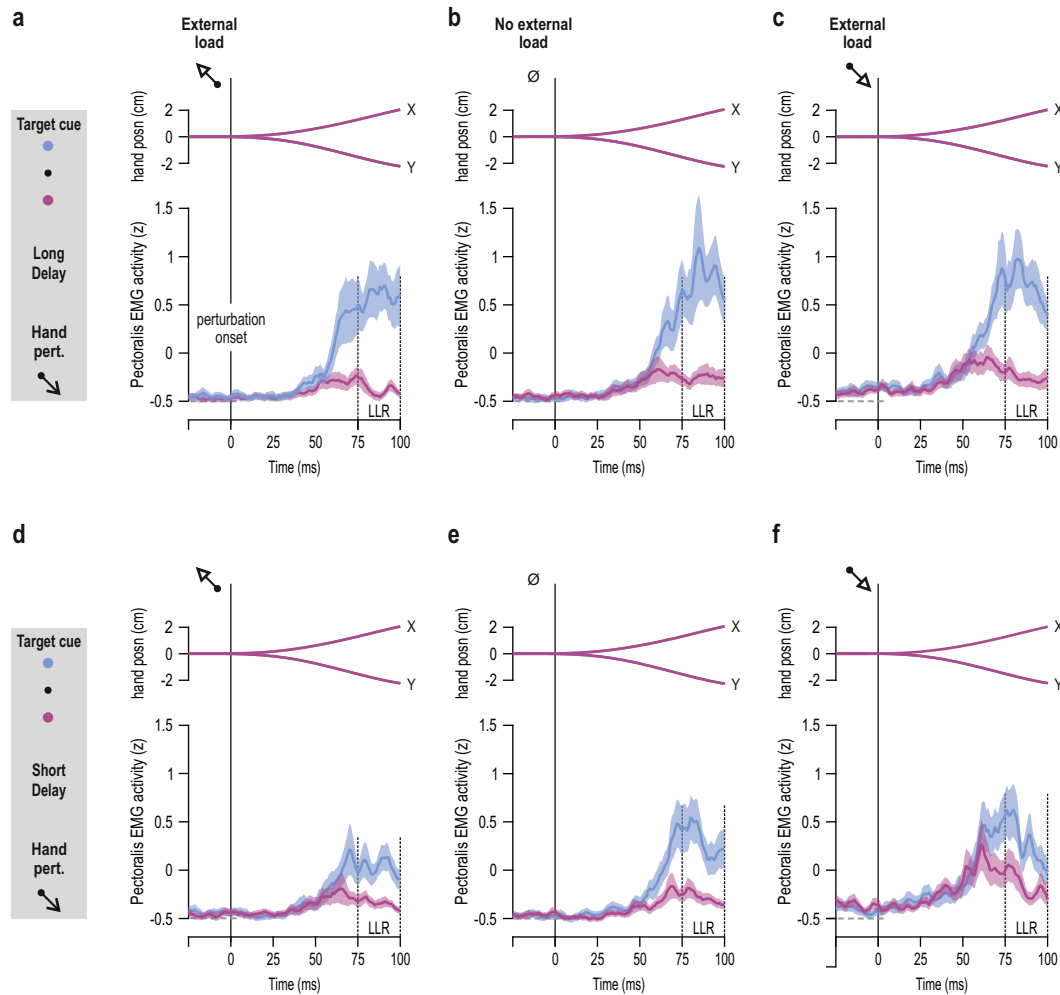

**Supplementary Figure 6: Goal- and delay-dependent modulation of LLR gains of the triceps muscle**

As Figure 6 but pertaining to triceps lateralis when the targets required reaching along the vertical axis of the workspace. **a-c** Mean hand position (posn.) and mean rectified triceps lateralis EMG activity across participants (N=12) when the external load was applied in the direction of triceps shortening ('a'), when there was no external load ('b'), and when the triceps was externally loaded i.e., the load was applied in the direction of triceps stretch ('c'). Shading represents  $\pm 1$  s.e.m. As the schematic on the far left indicates, the data represent trials where the preparatory delay was relatively long (1.2 sec) and the subsequent perturbation stretched the triceps. LLR denotes the epoch associated with the long-latency or 'R3' stretch reflex response. **d-f** As top row of panels but representing trials where the preparatory delay was relatively short (0.2 sec).
